# Supplementary material for: Quasi-biomimetic ring contraction promoted by a cysteine-based nucleophile: Total synthesis of Sch-642305, some analogs and their putative anti-HIV activities
Source: Royal Society of Chemistry journal article supplement (doi:10.1039/c1sc00221j), 2011-01-01

***Supporting Information***

Quasi-Biomimetic Ring Contraction Promoted by a Cysteine-Based Nucleophile:  
Total Synthesis of Sch-642305, Some Analogs and their Putative anti-HIV  
Activities

Alpay Dermenci,<sup>a</sup> Philipp S. Selig,<sup>a</sup> Robert A. Domaoal,<sup>b</sup> Krasimir A. Spasov,<sup>b</sup> Karen S.  
Anderson,<sup>b</sup> Scott J. Miller<sup>a,\*</sup>

<sup>a</sup>*Department of Chemistry, Yale University, P.O. Box 208107, New Haven, CT 06520-8107*

<sup>b</sup>*Department of Pharmacology, Yale University School of Medicine, 333 Cedar Street, SHM  
B350B, New Haven, CT 06520*

**Supporting Information**

V. Spectral Data

(S-142)

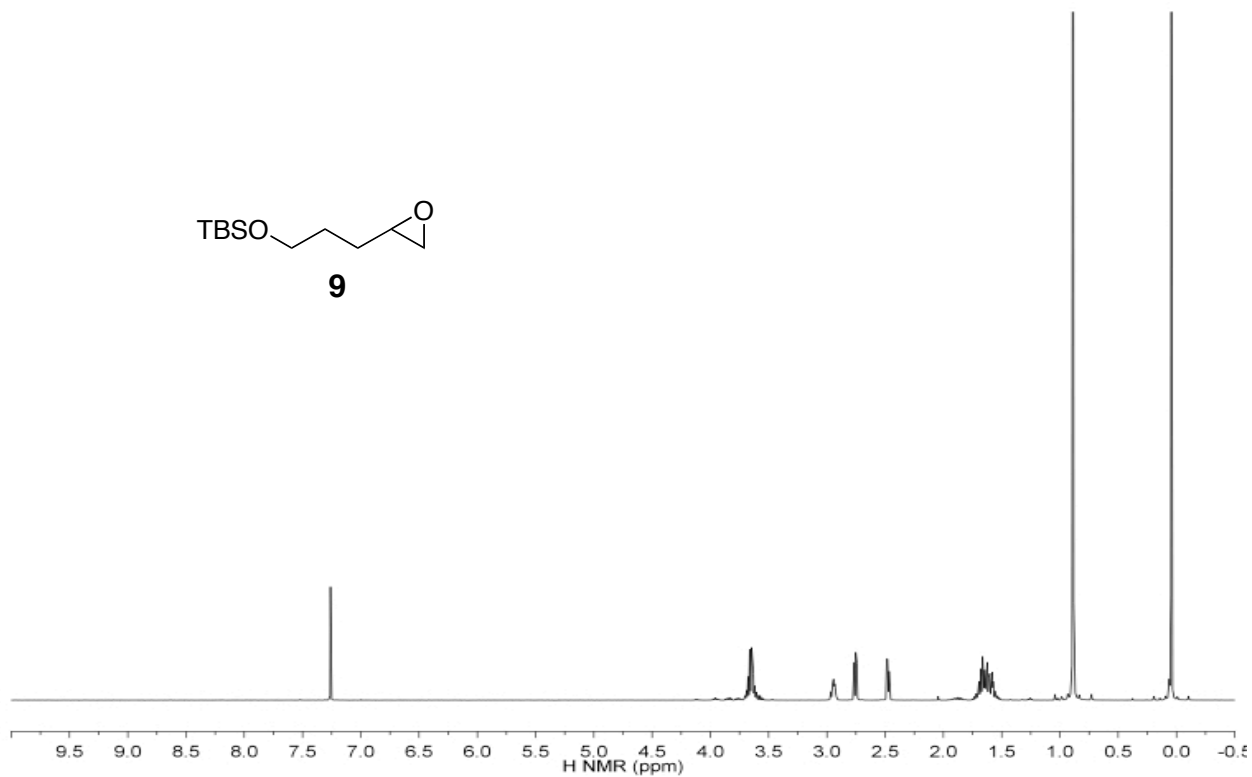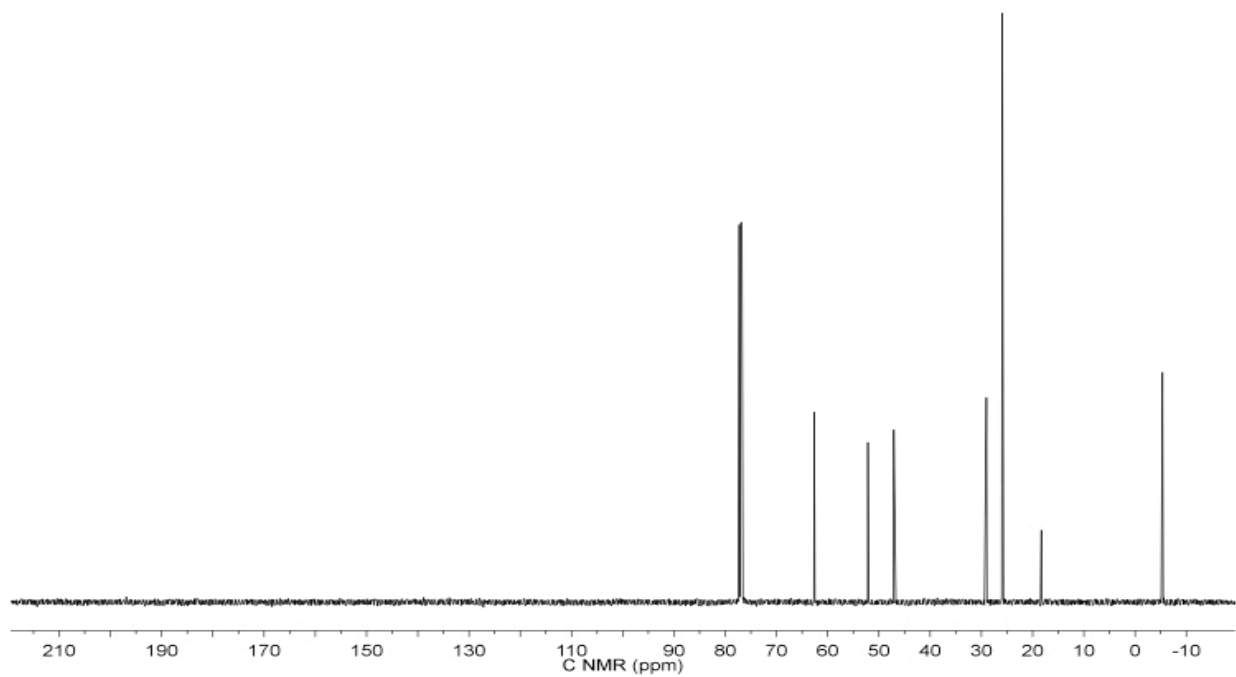



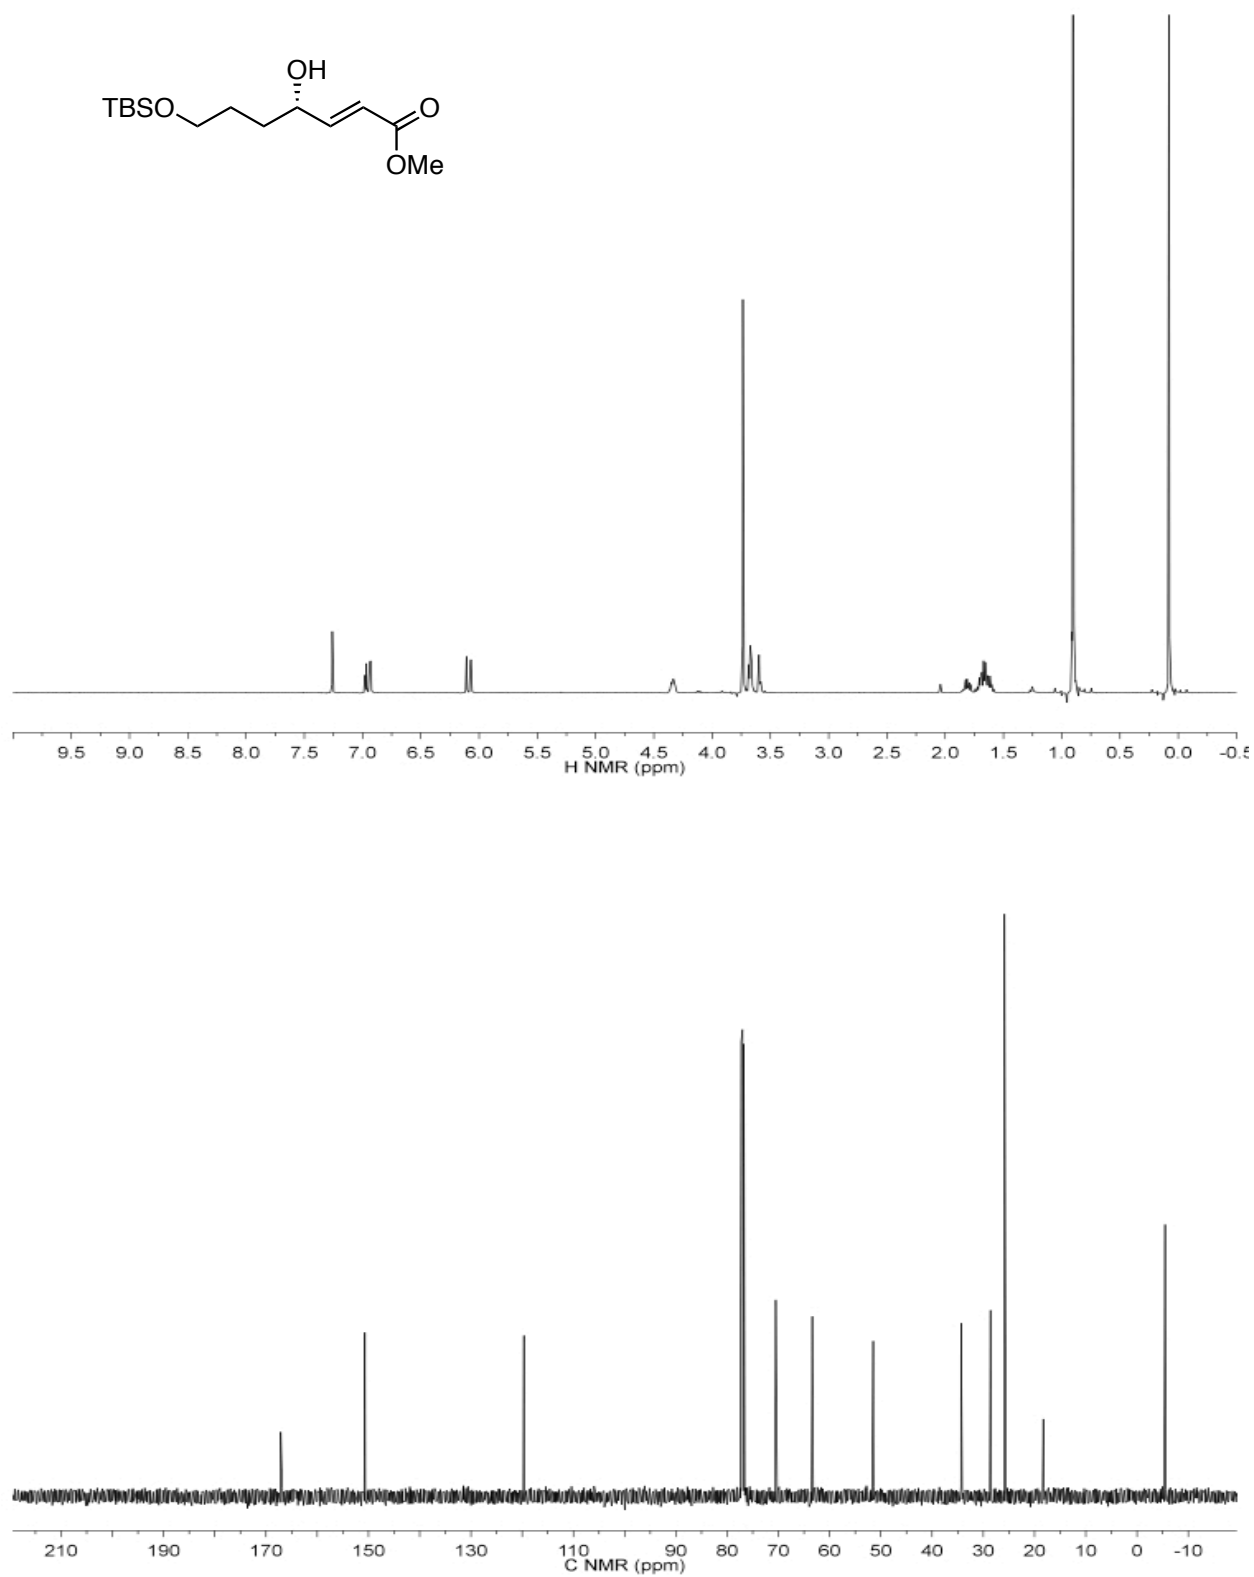





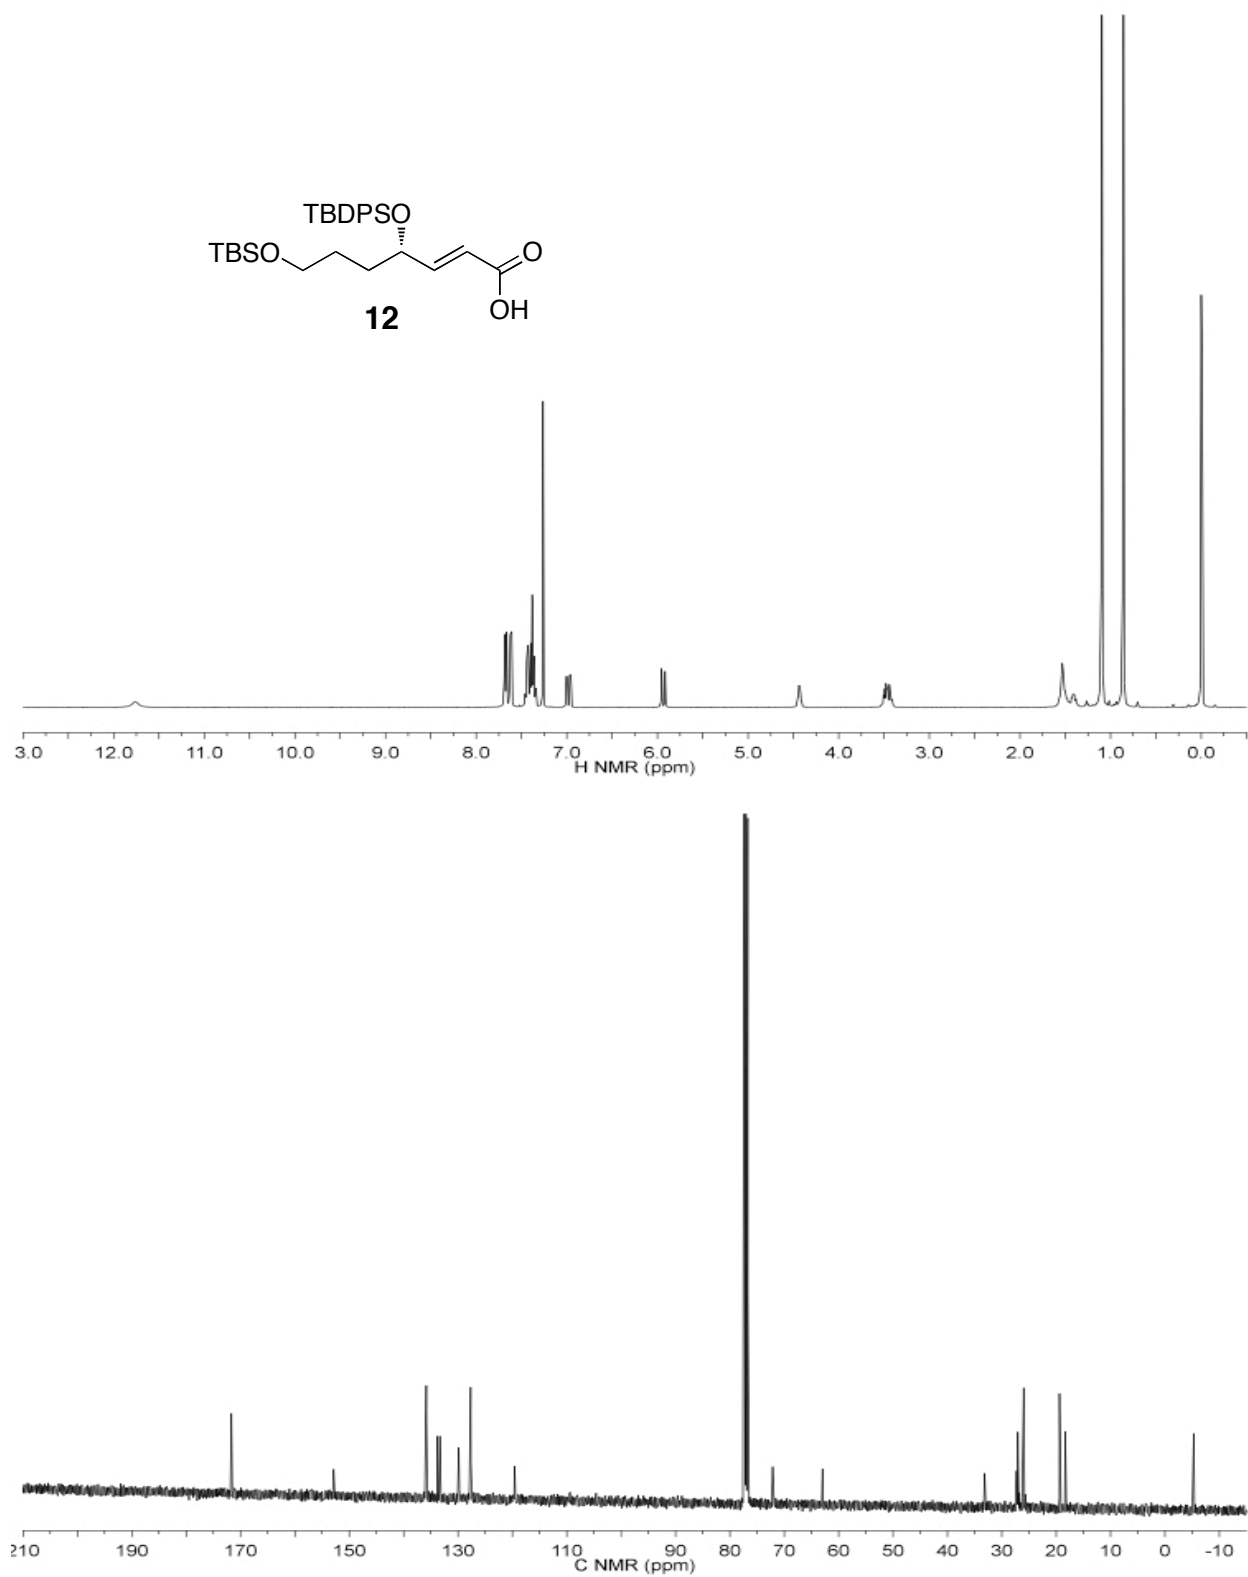

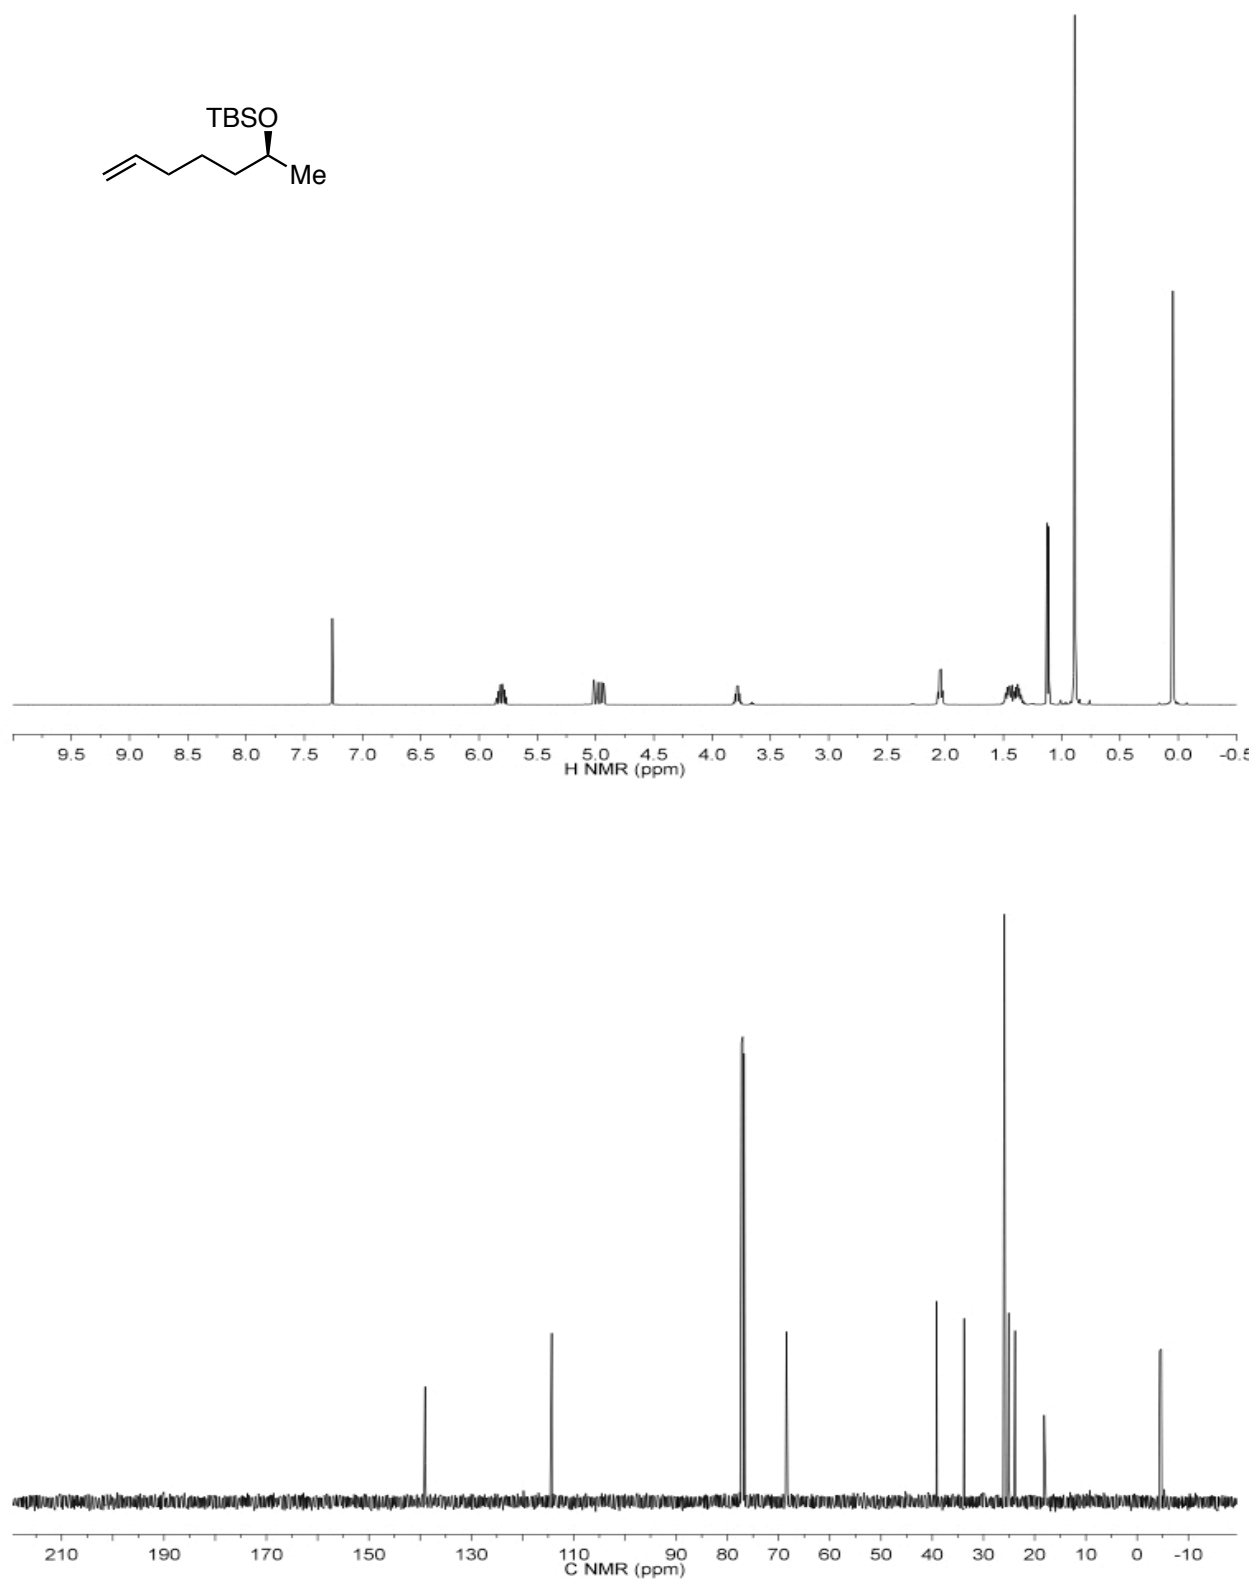



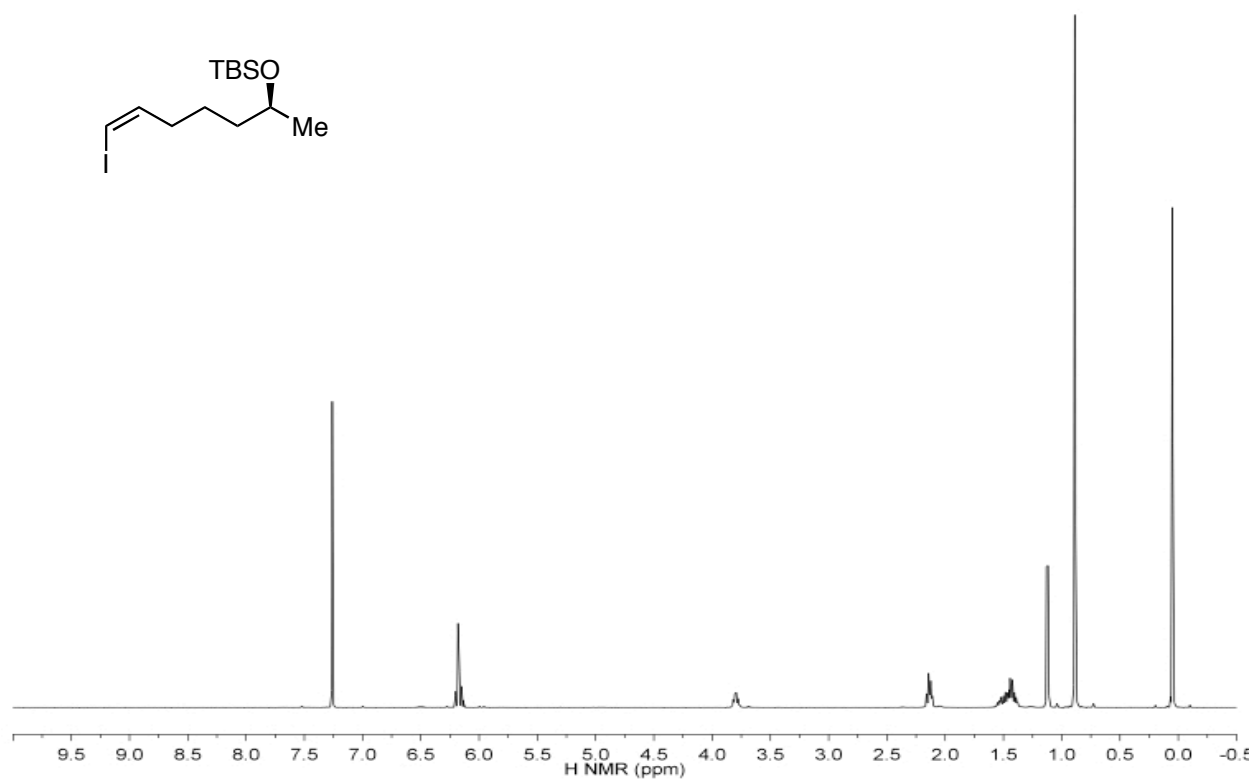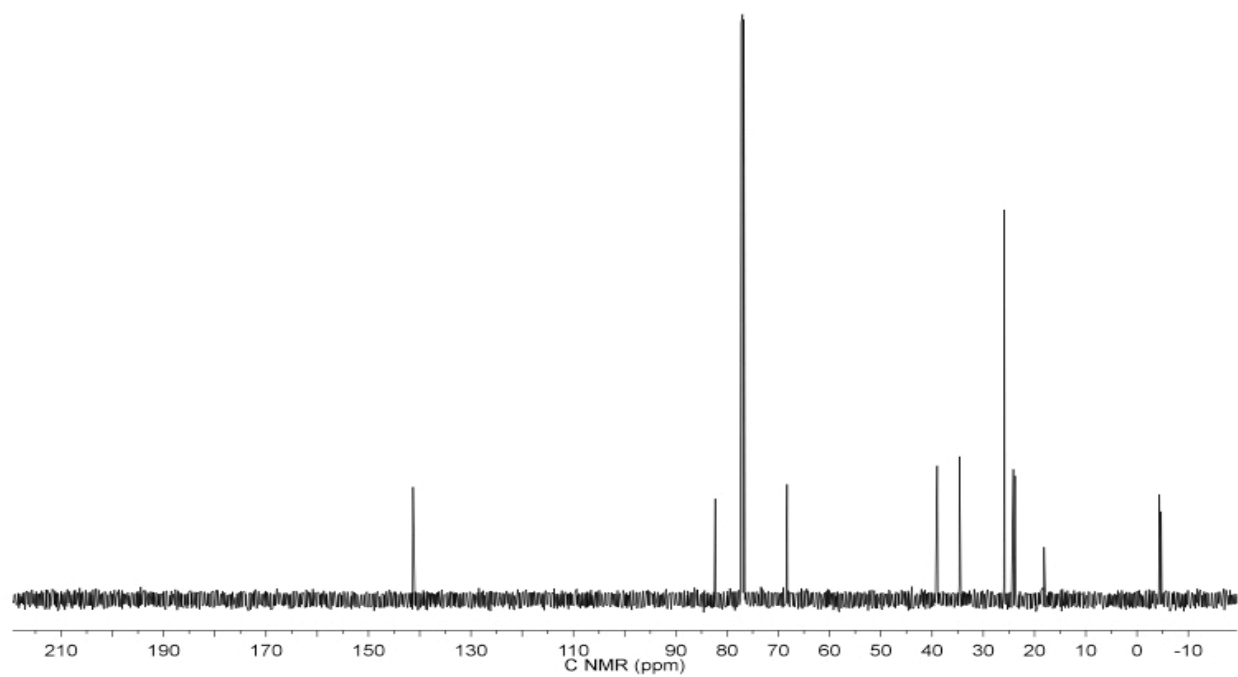

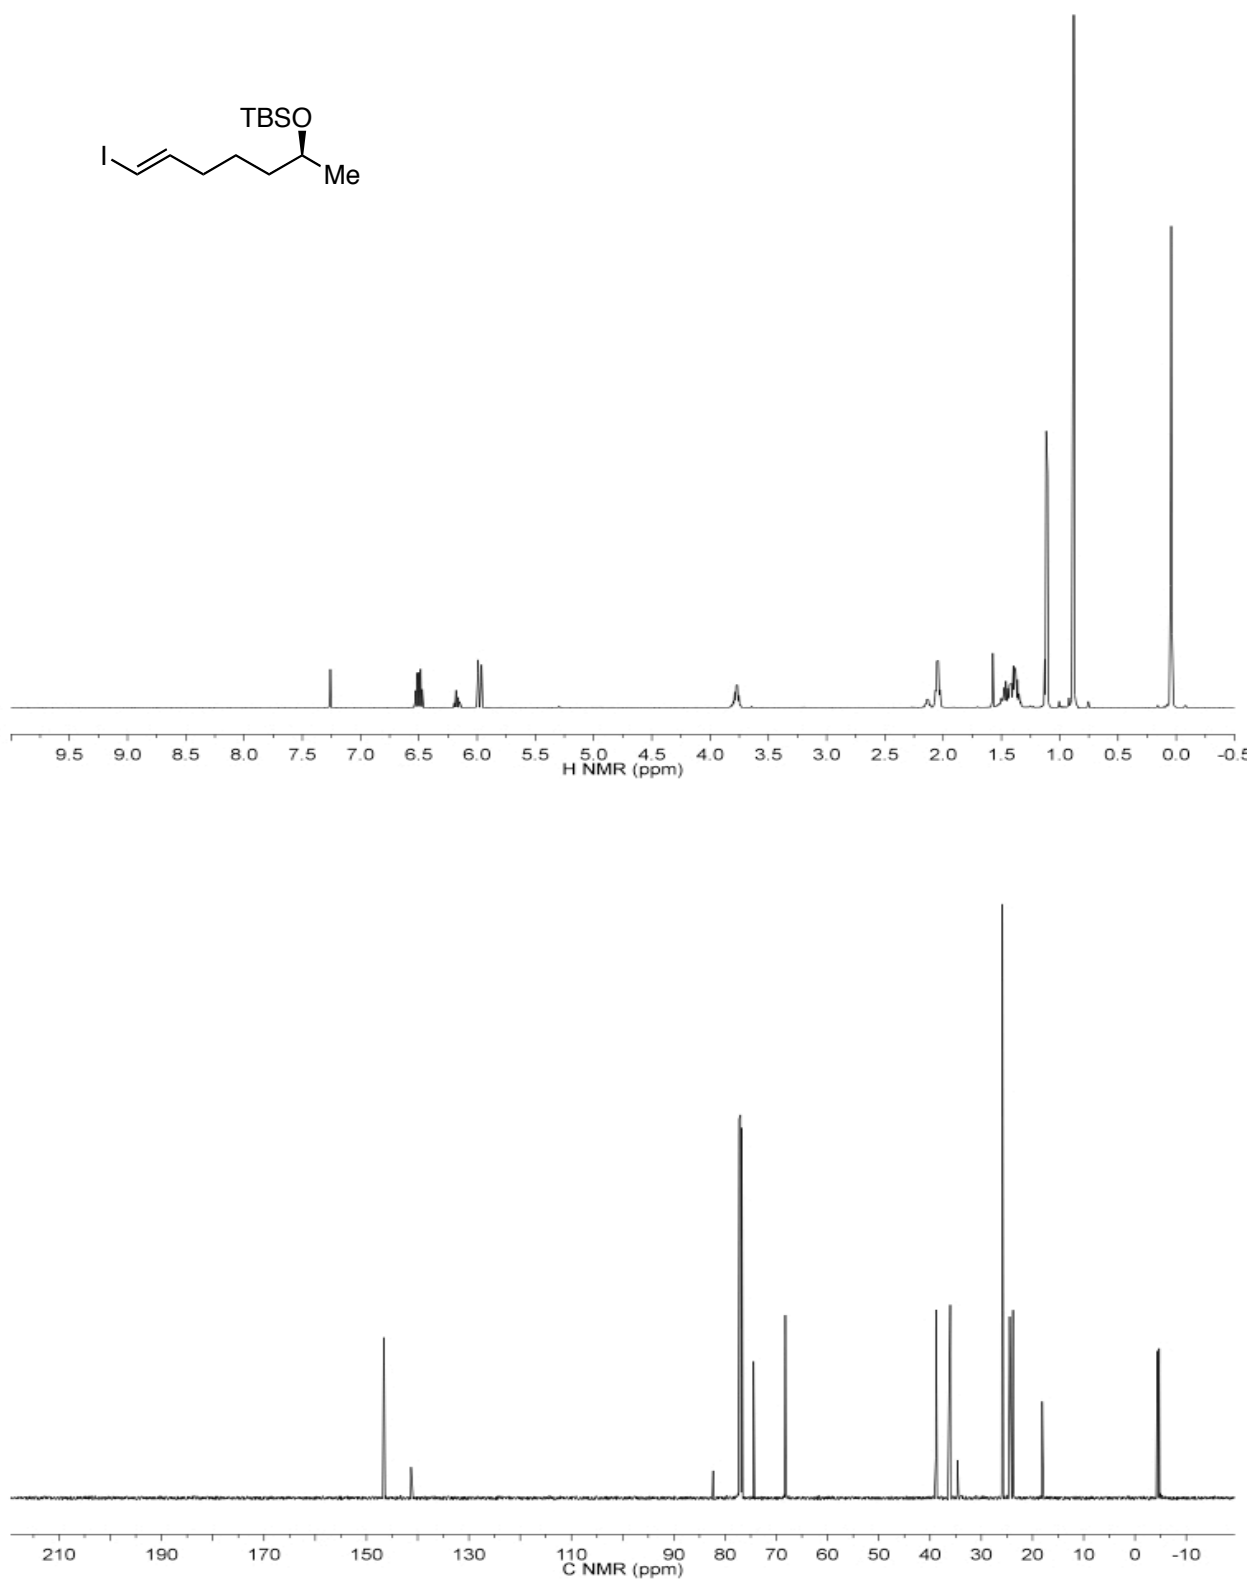

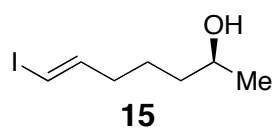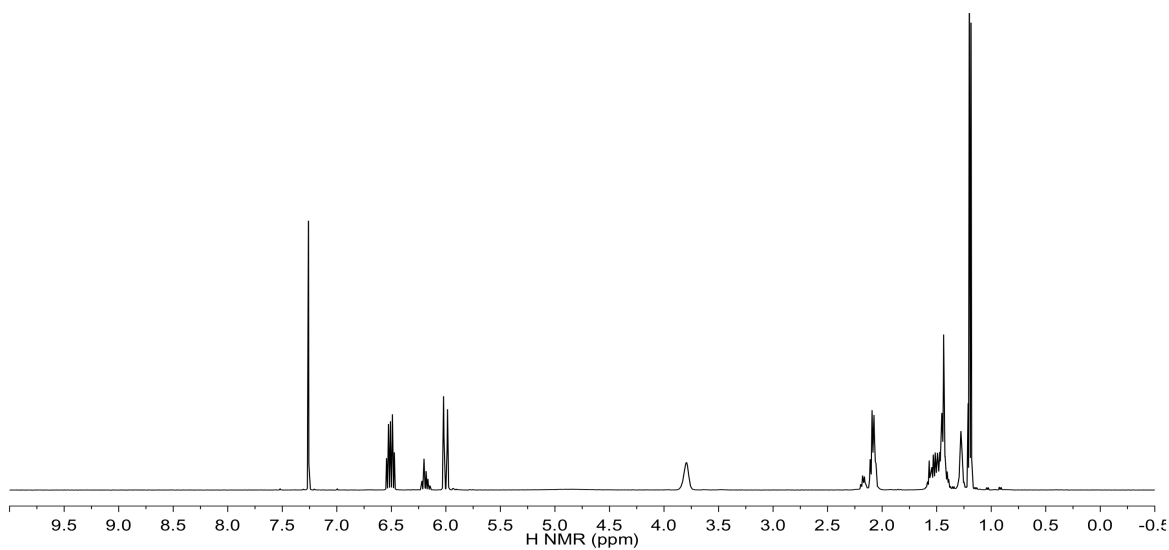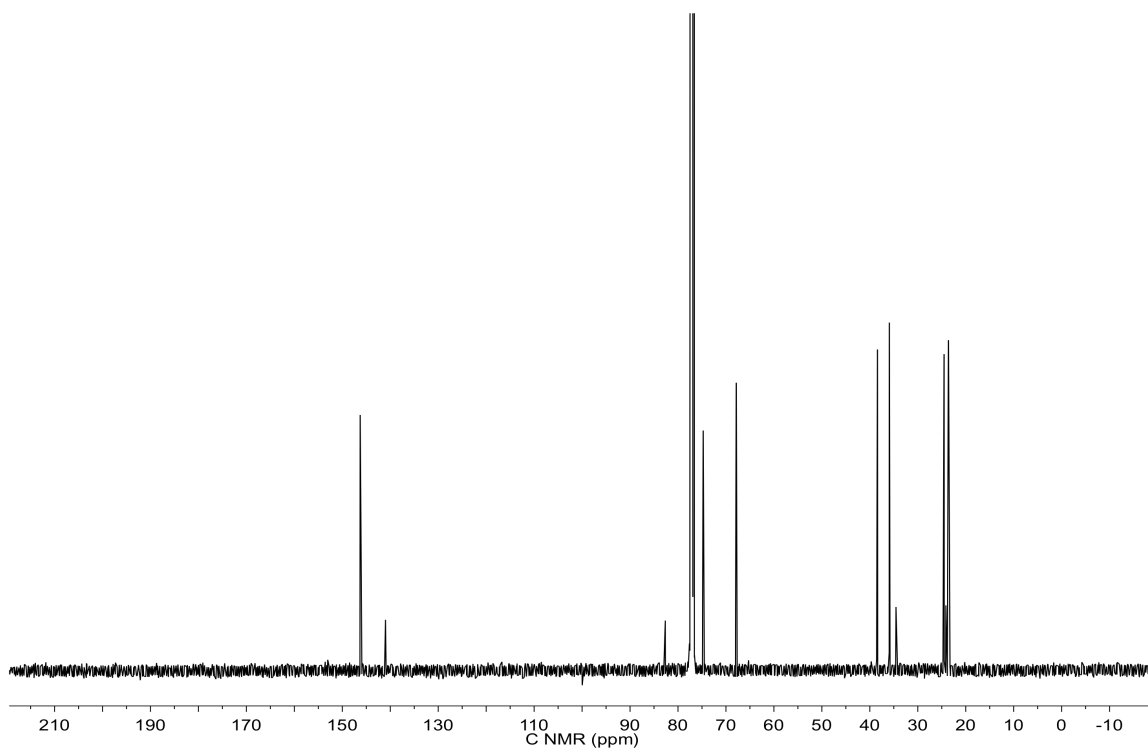

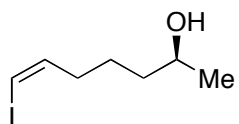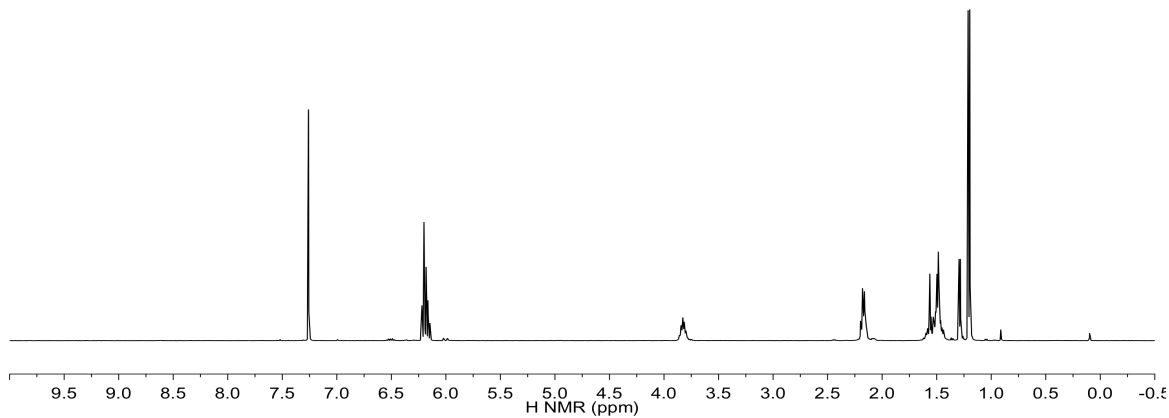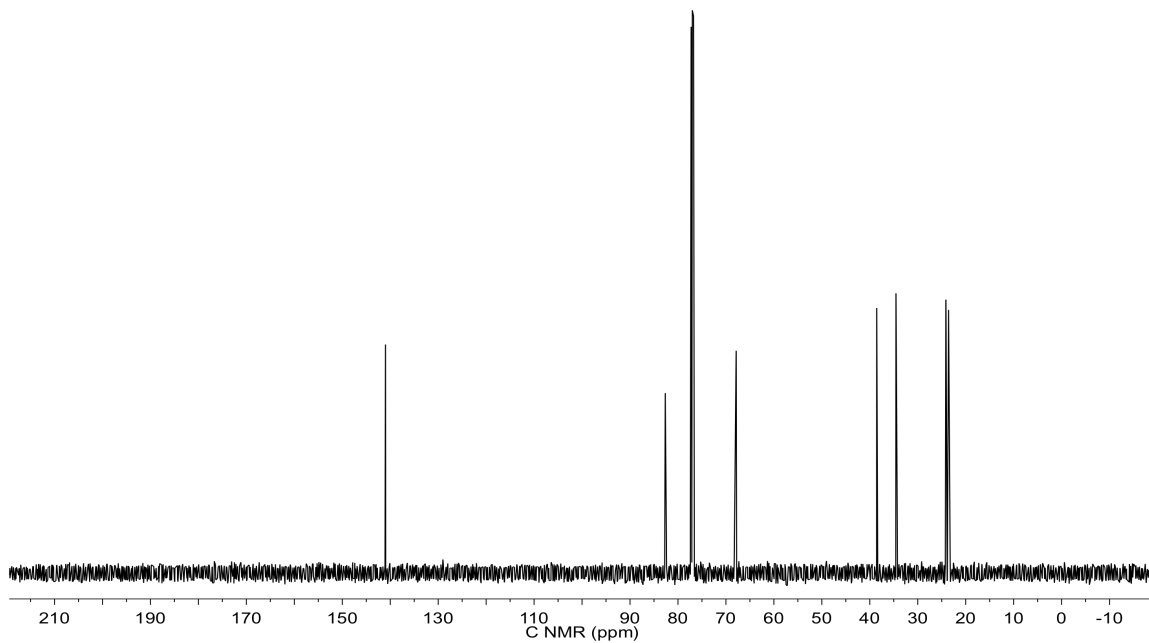



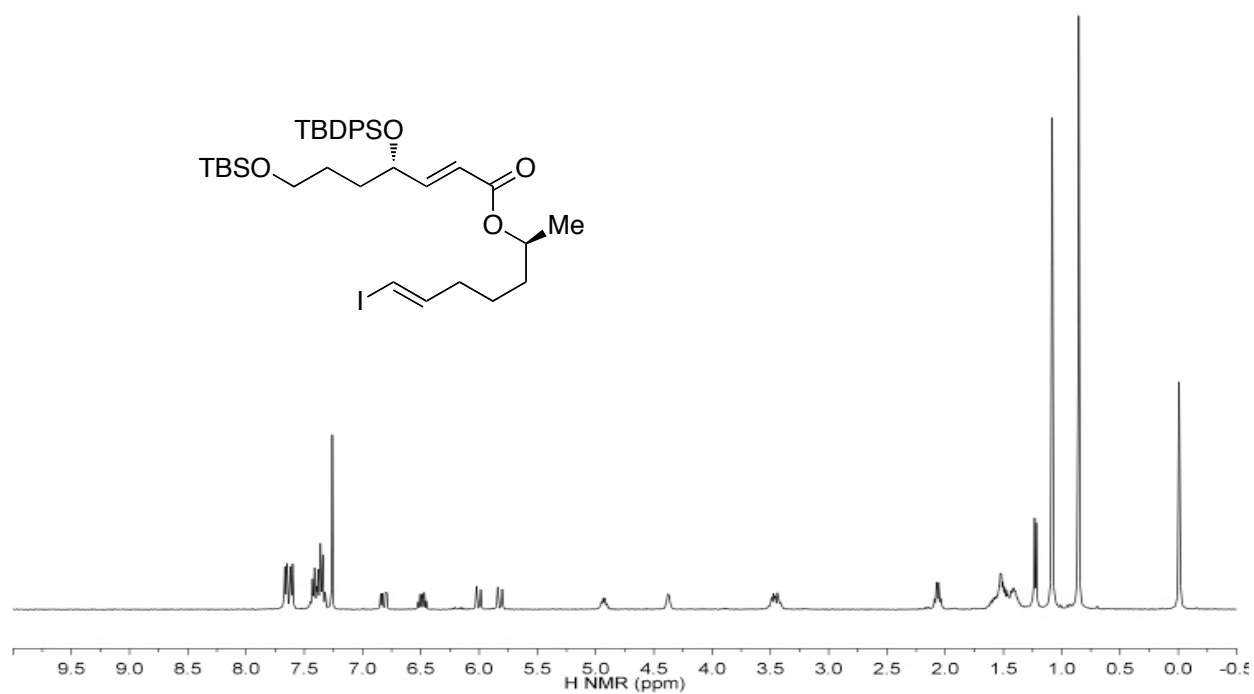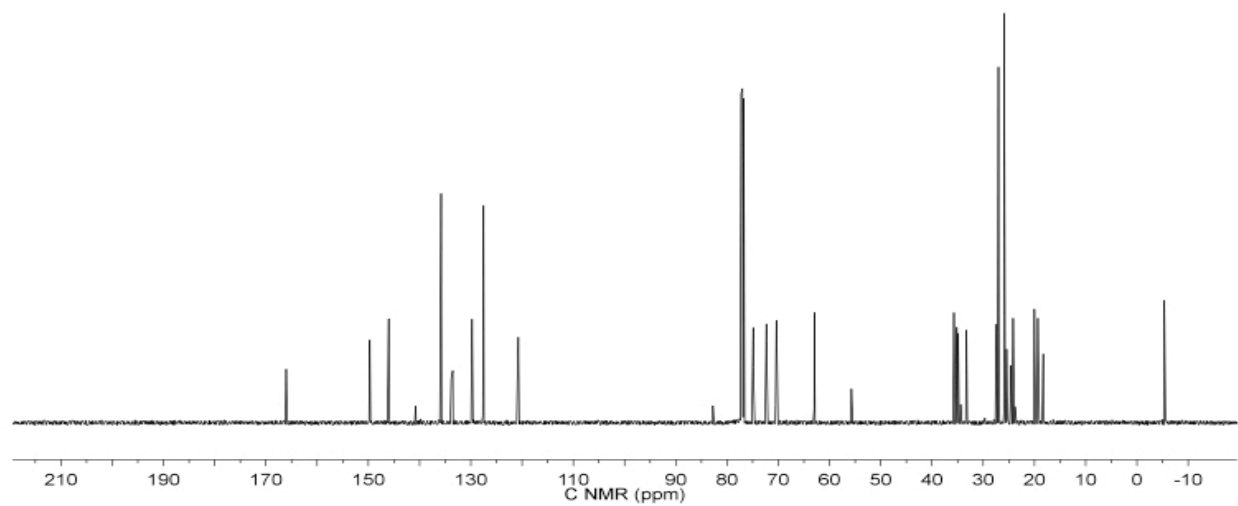

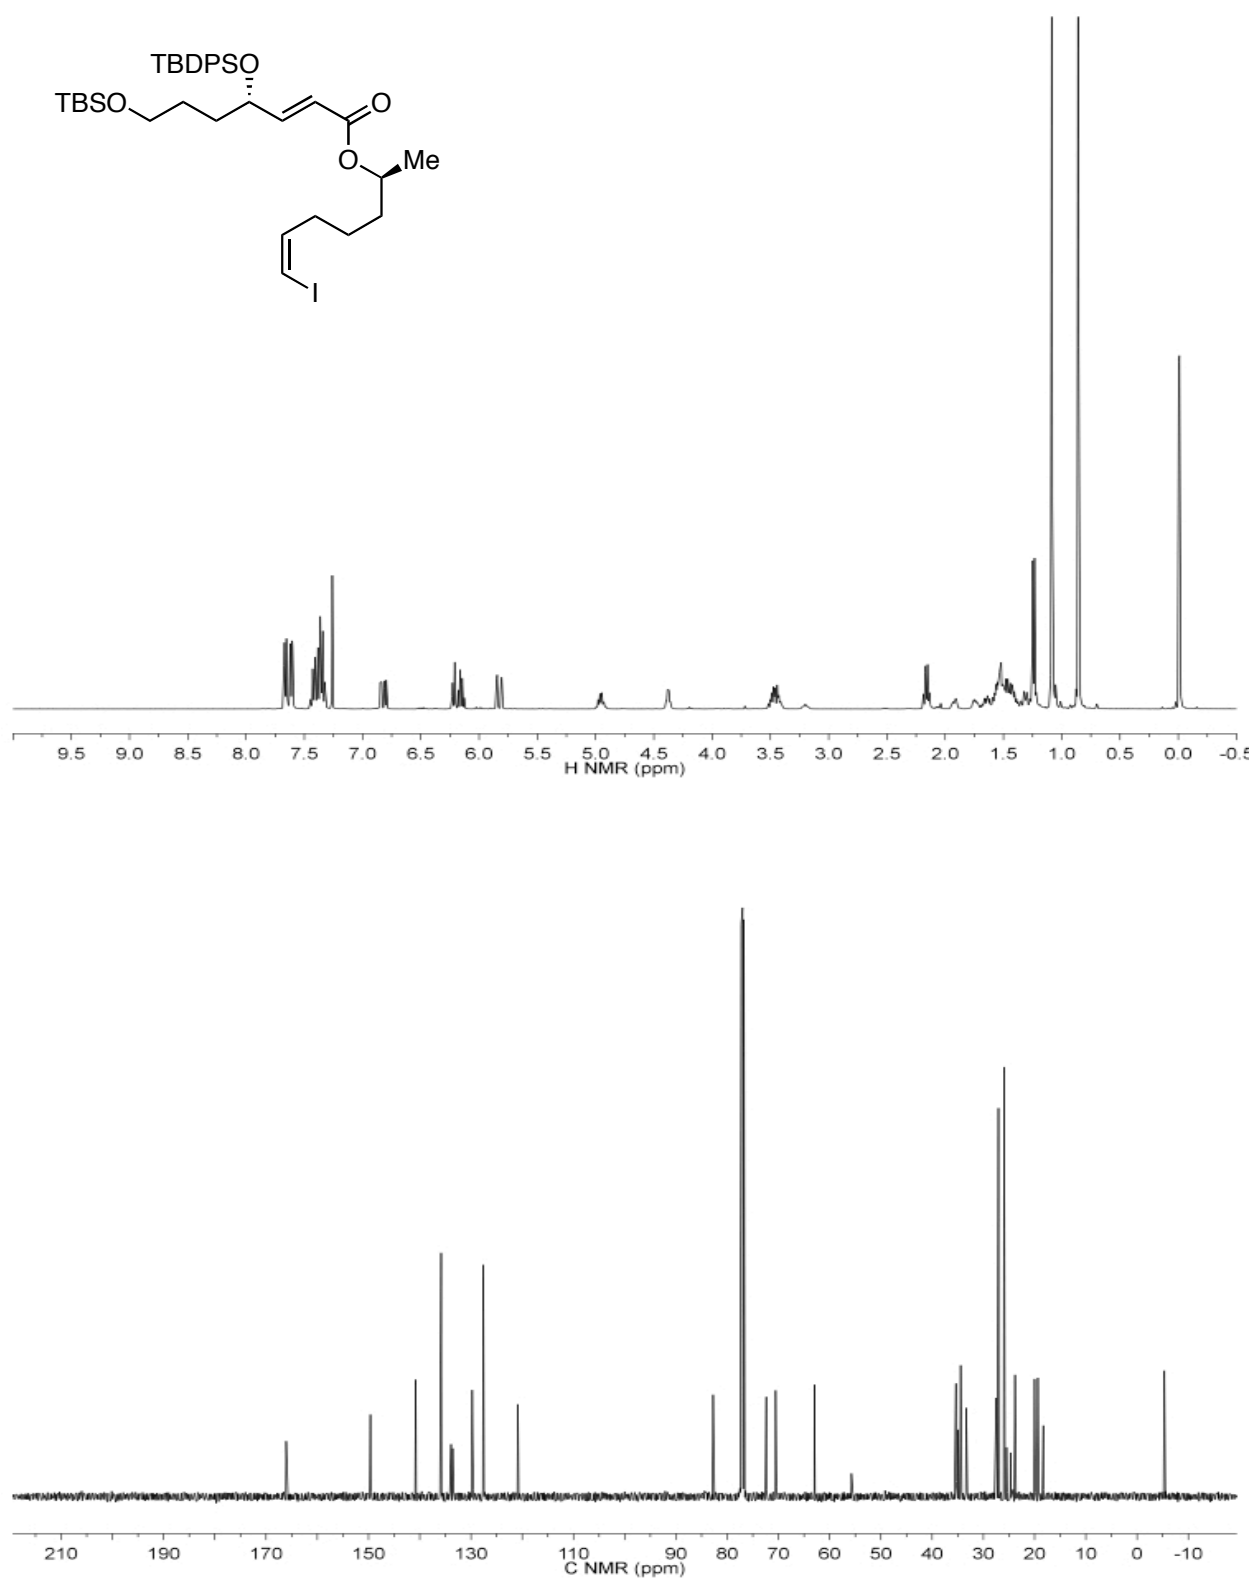

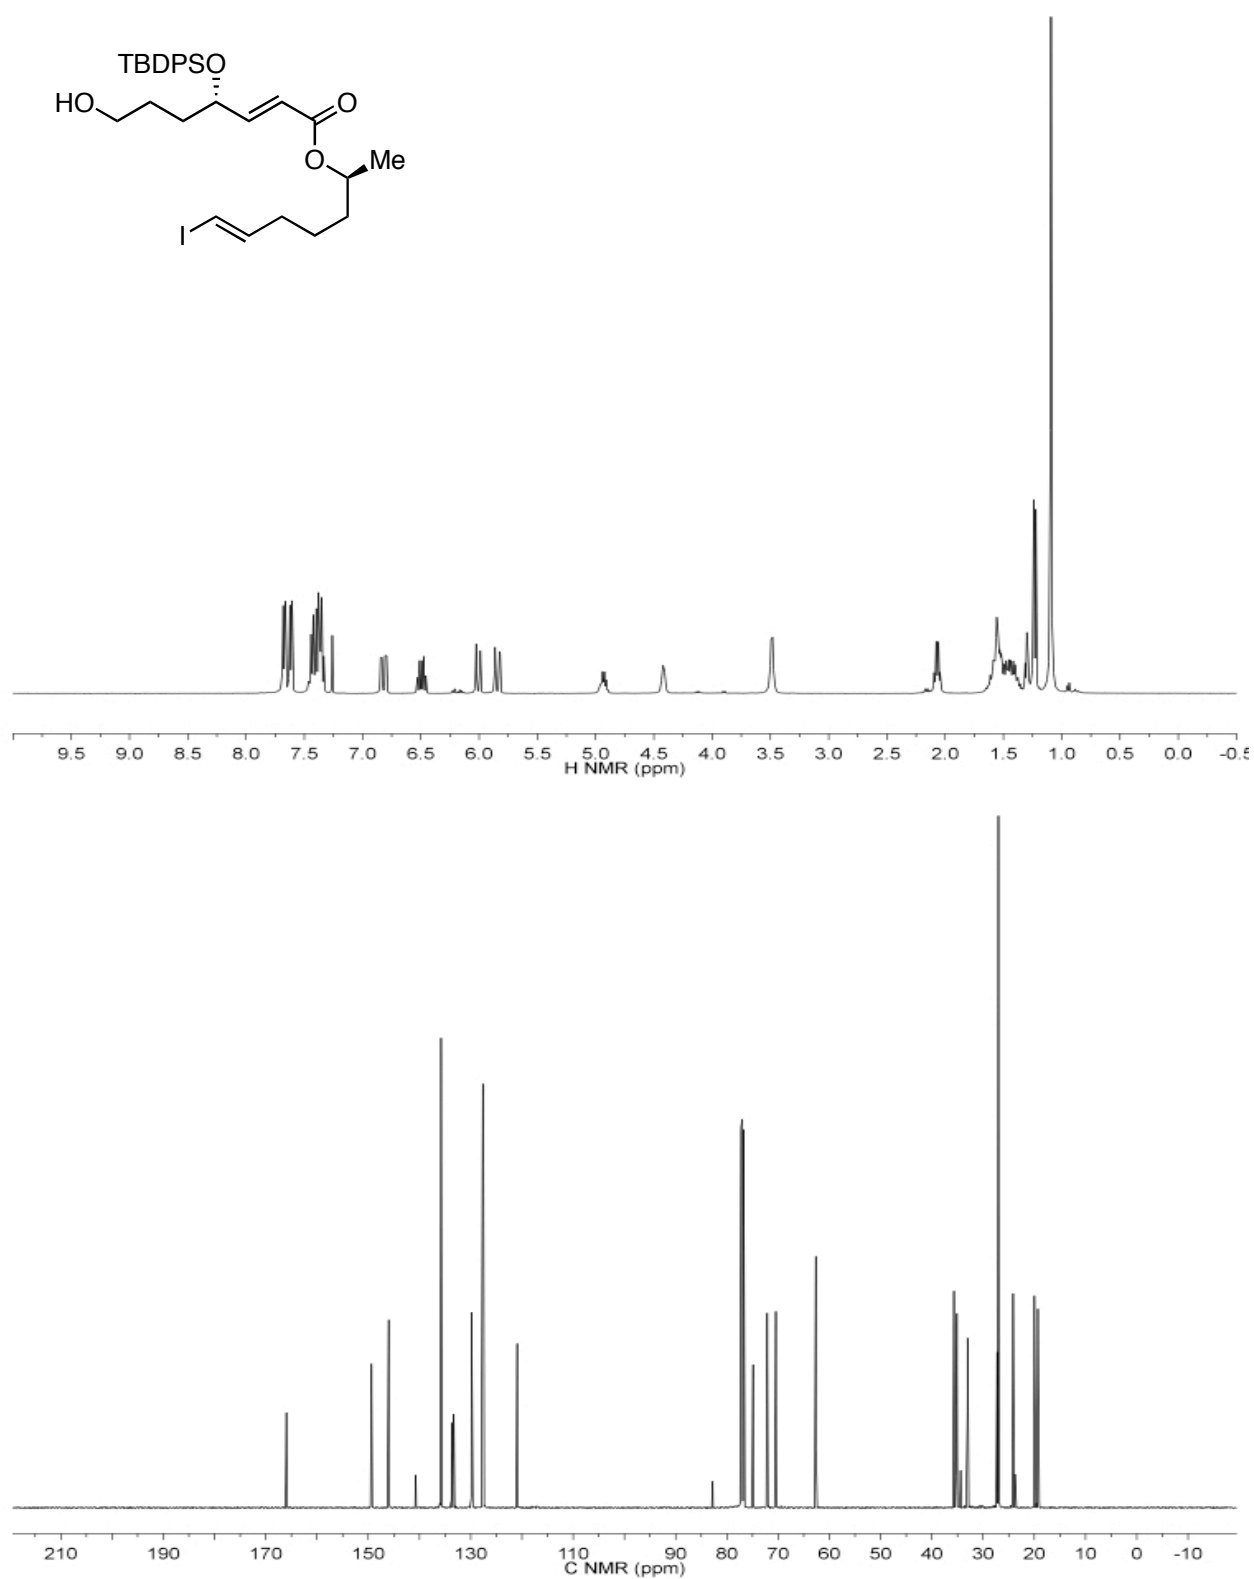

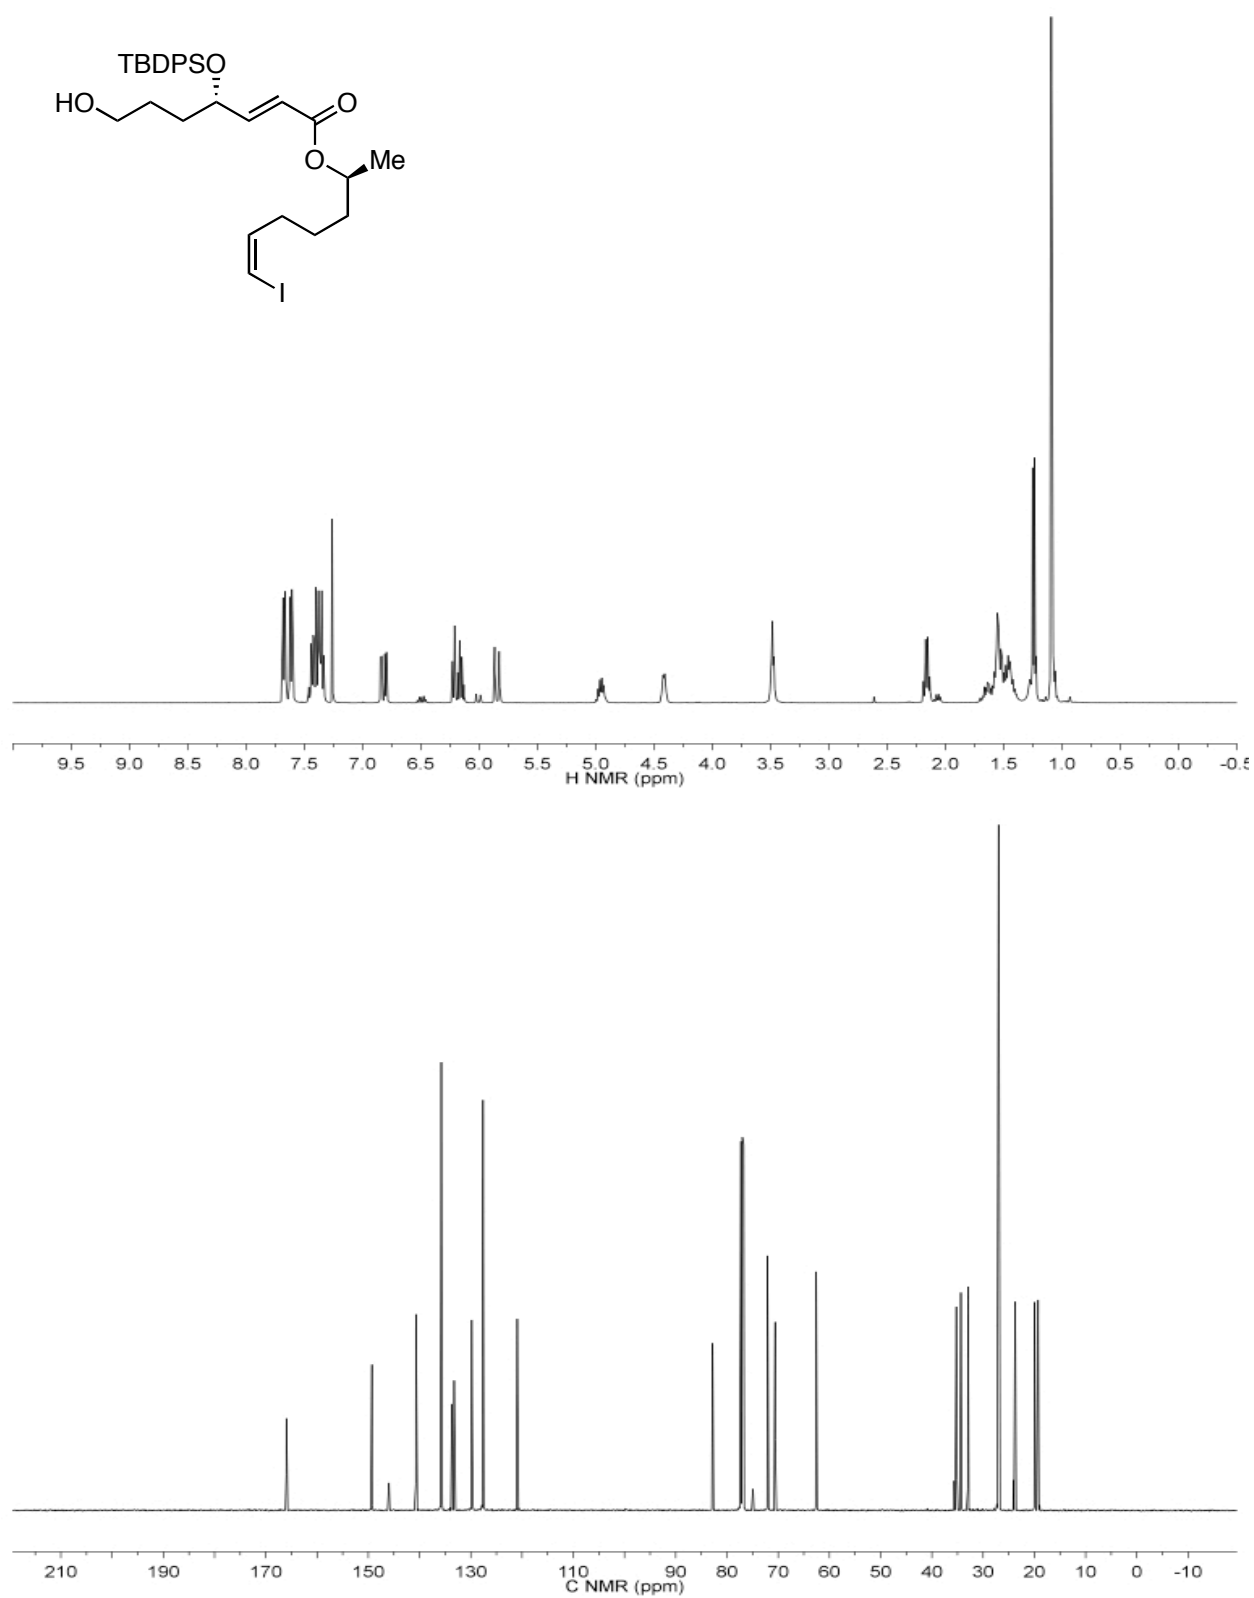

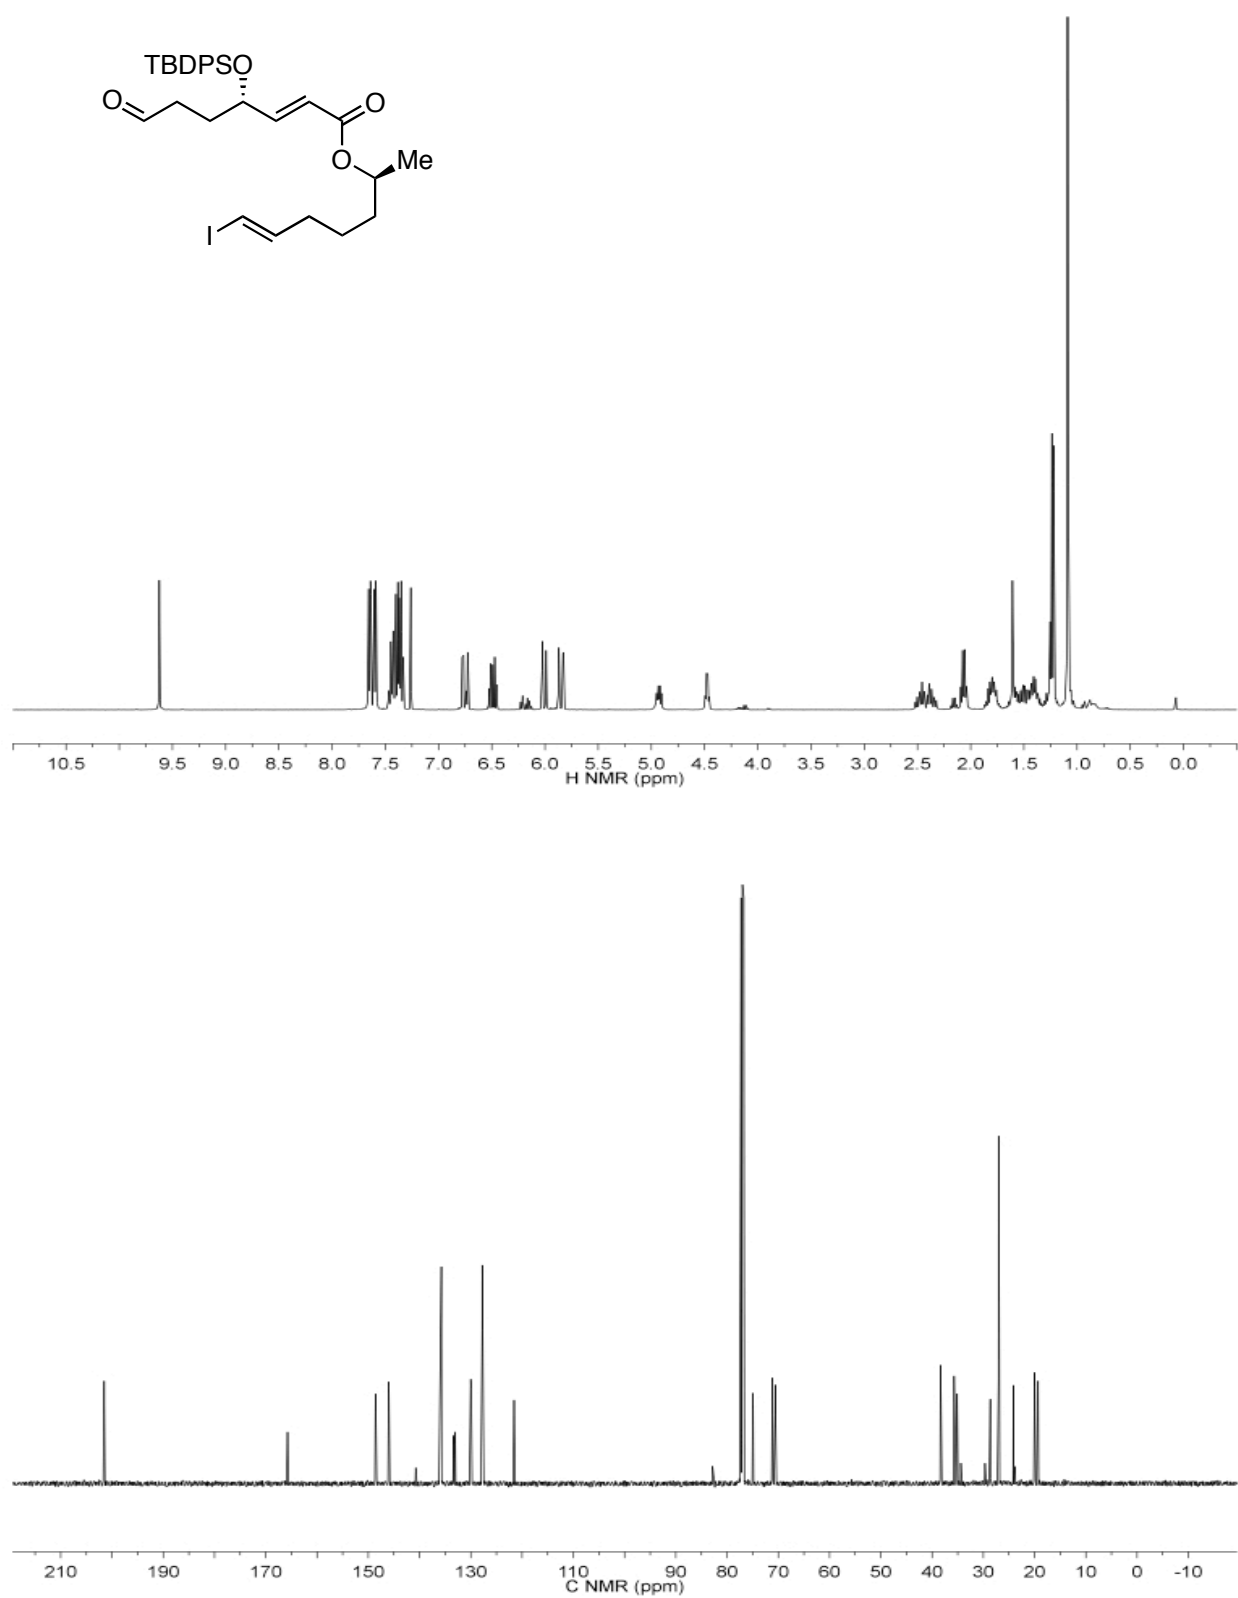

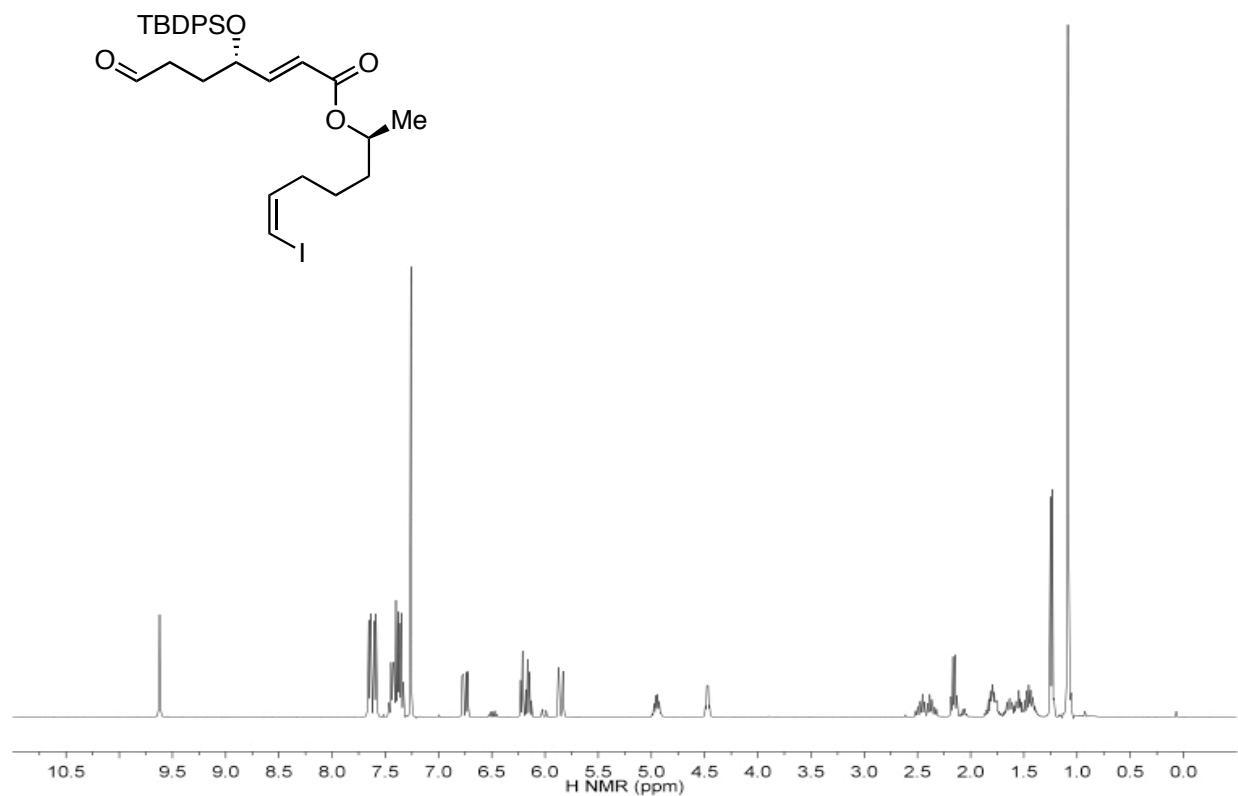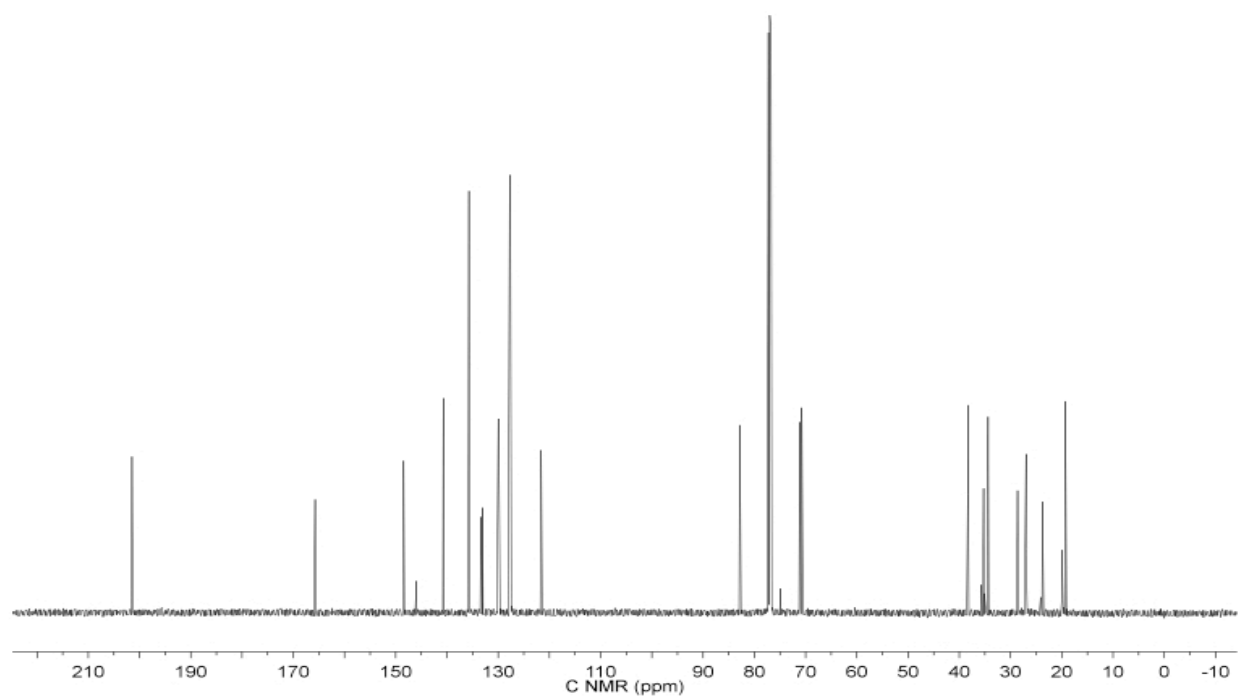

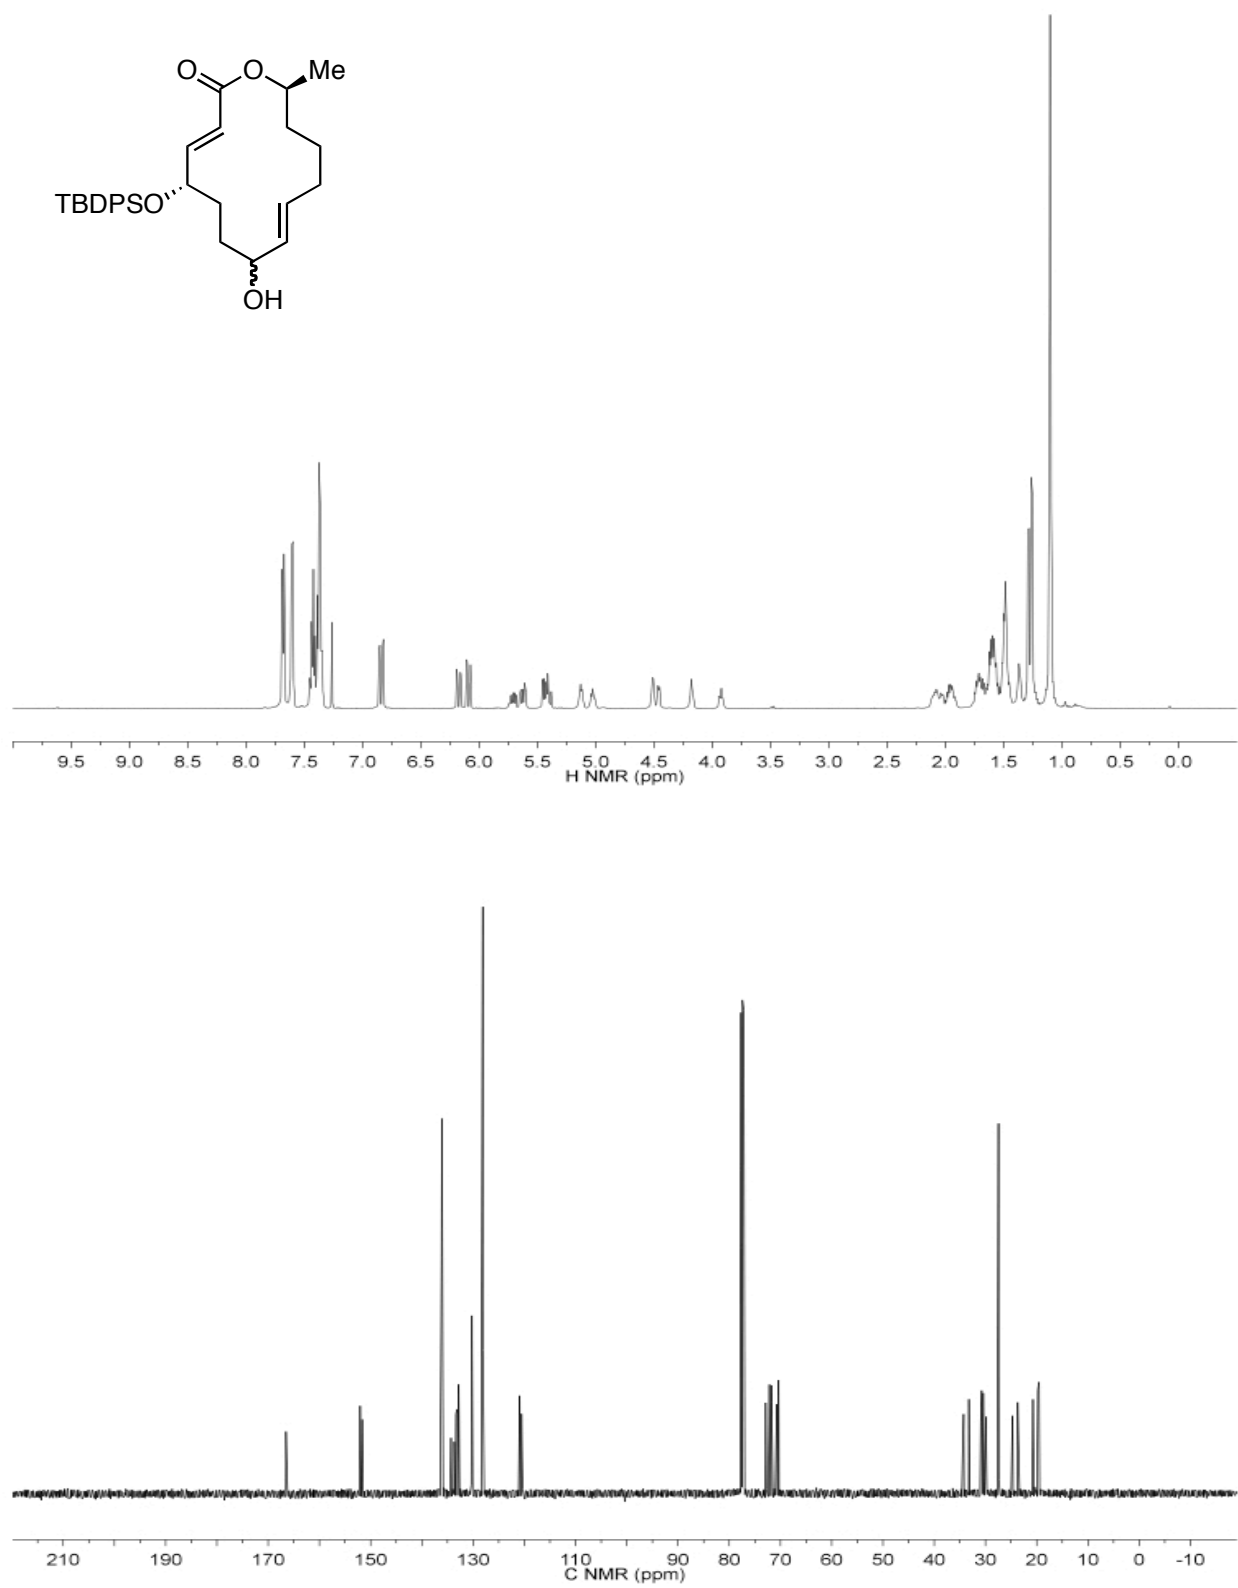

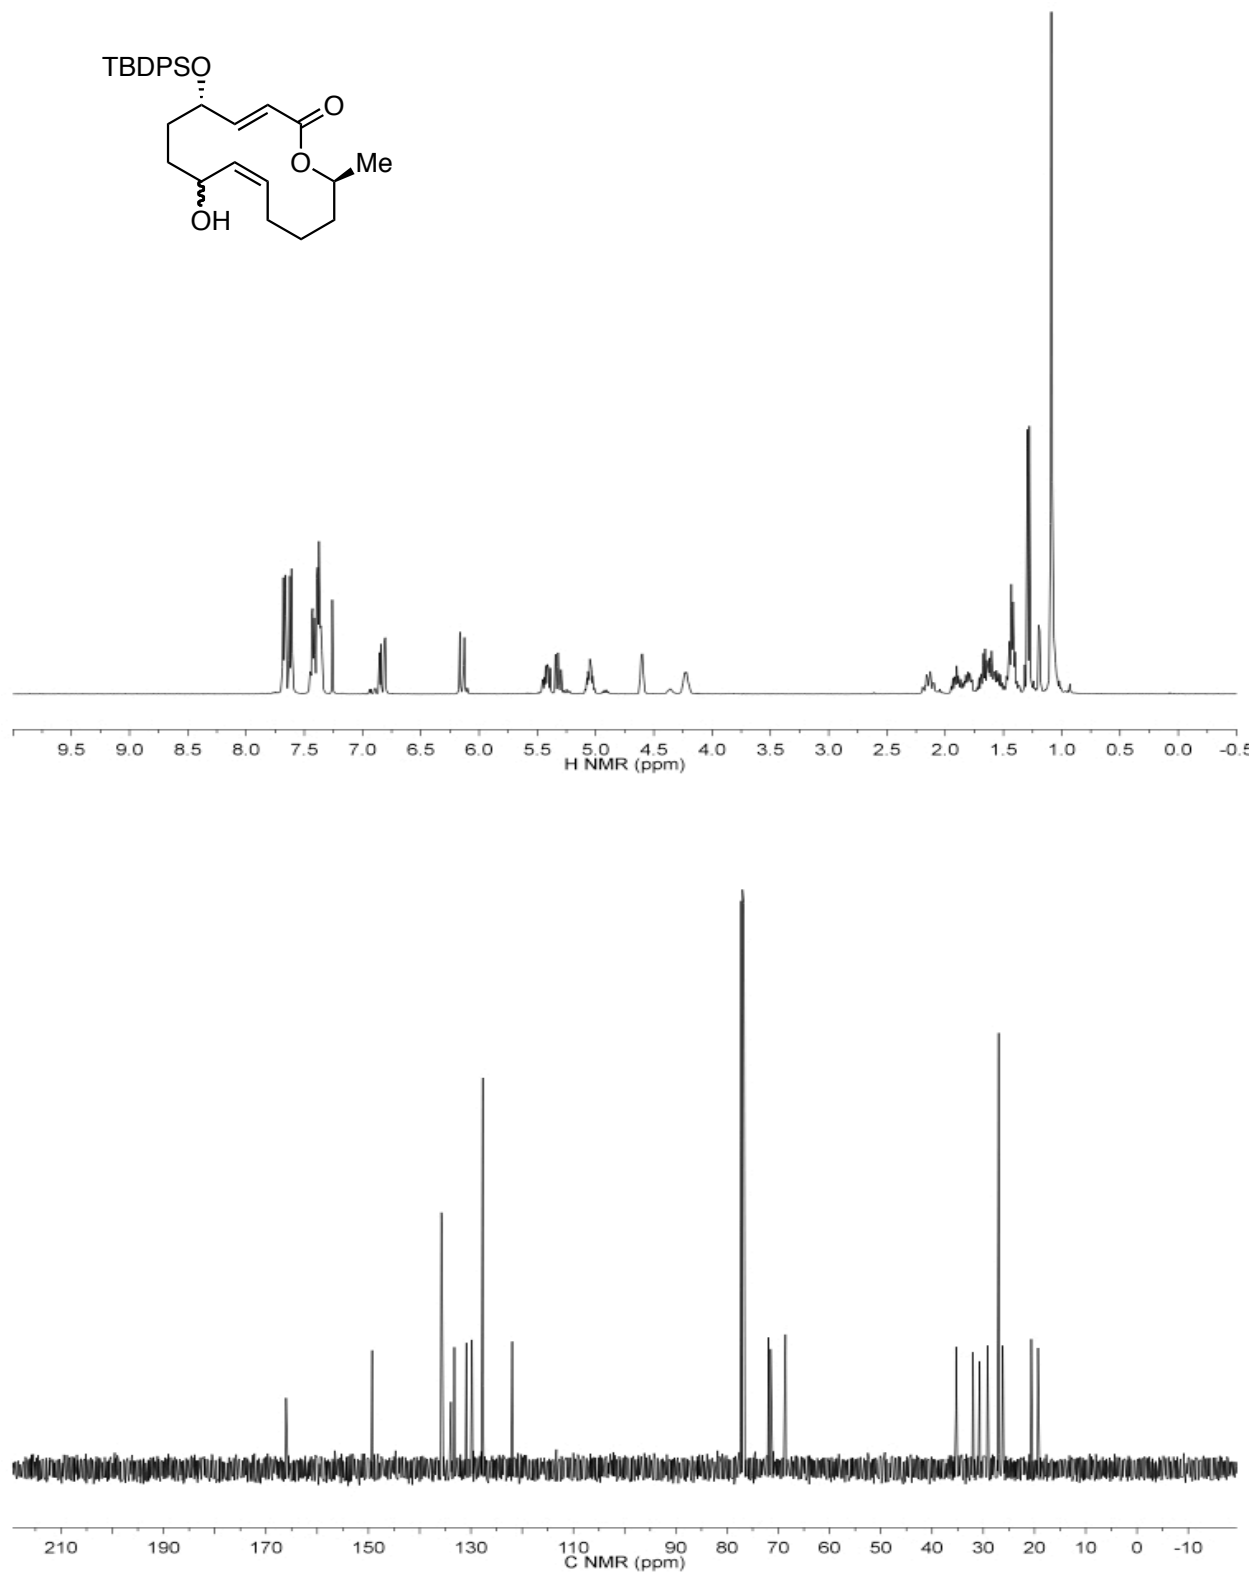





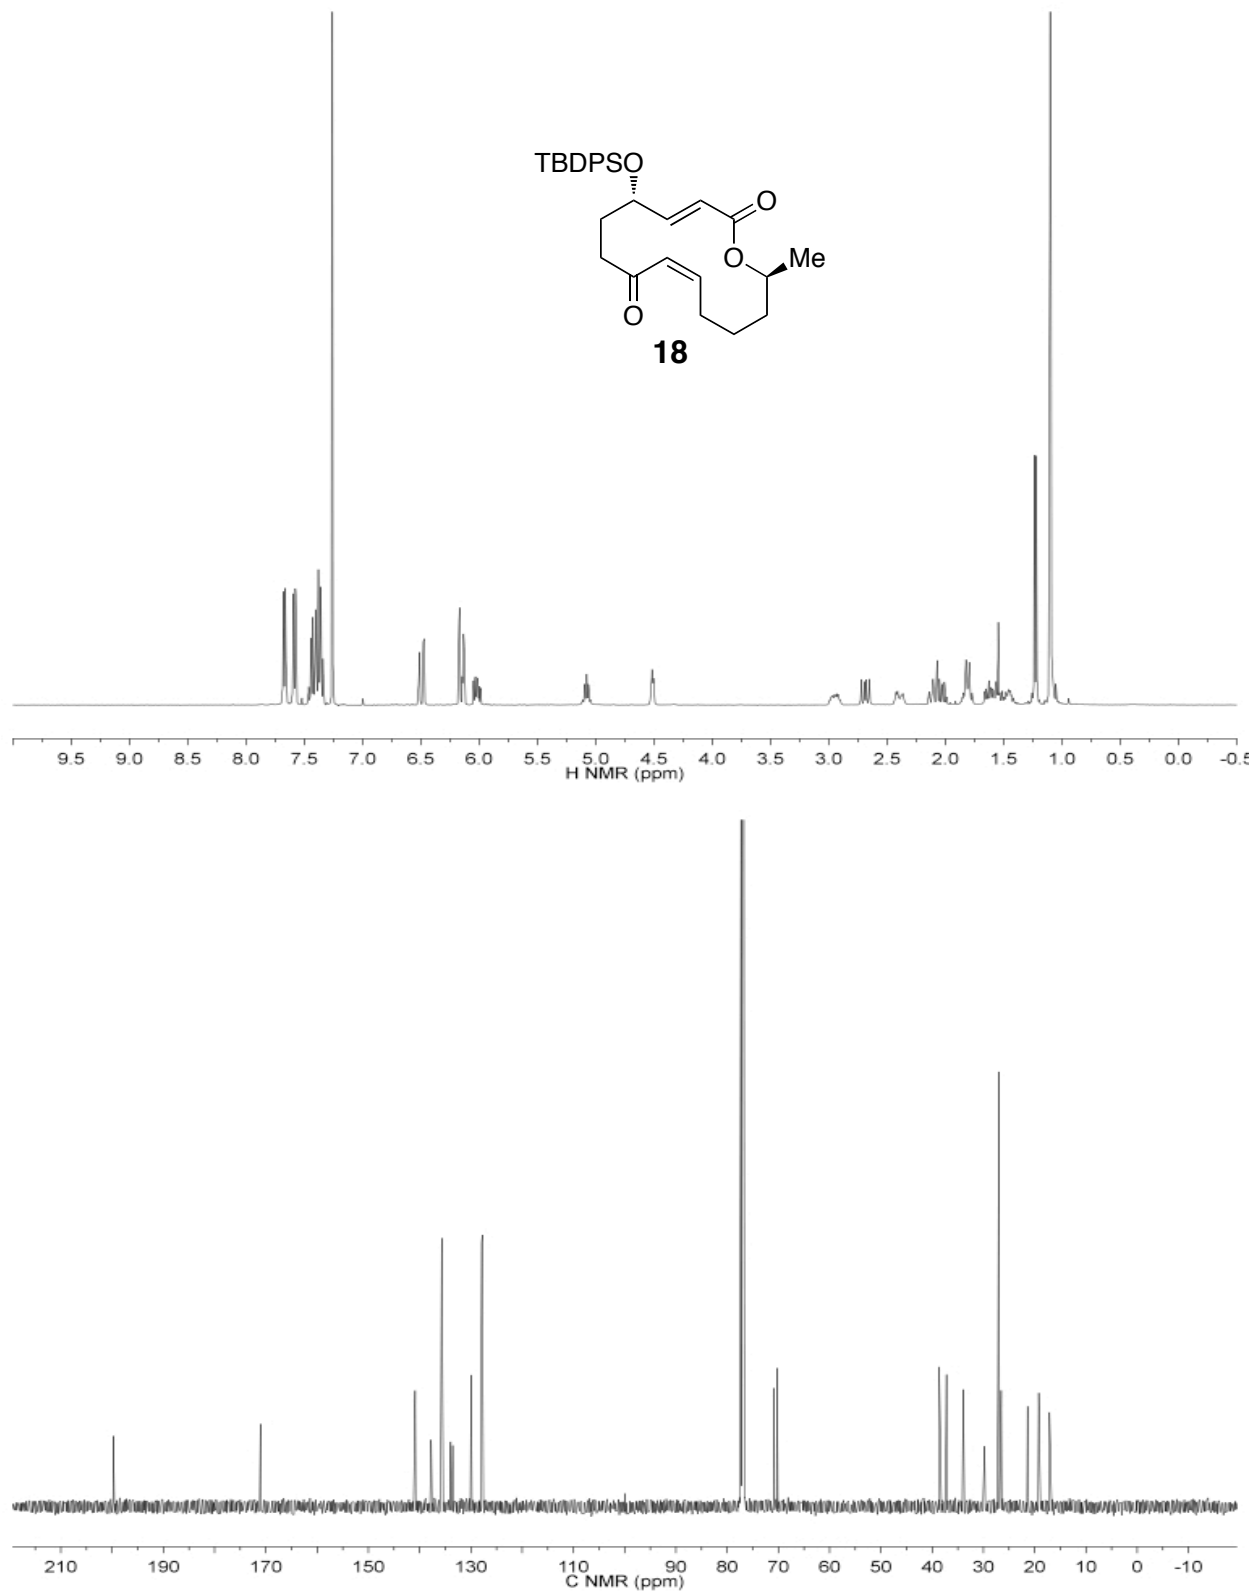

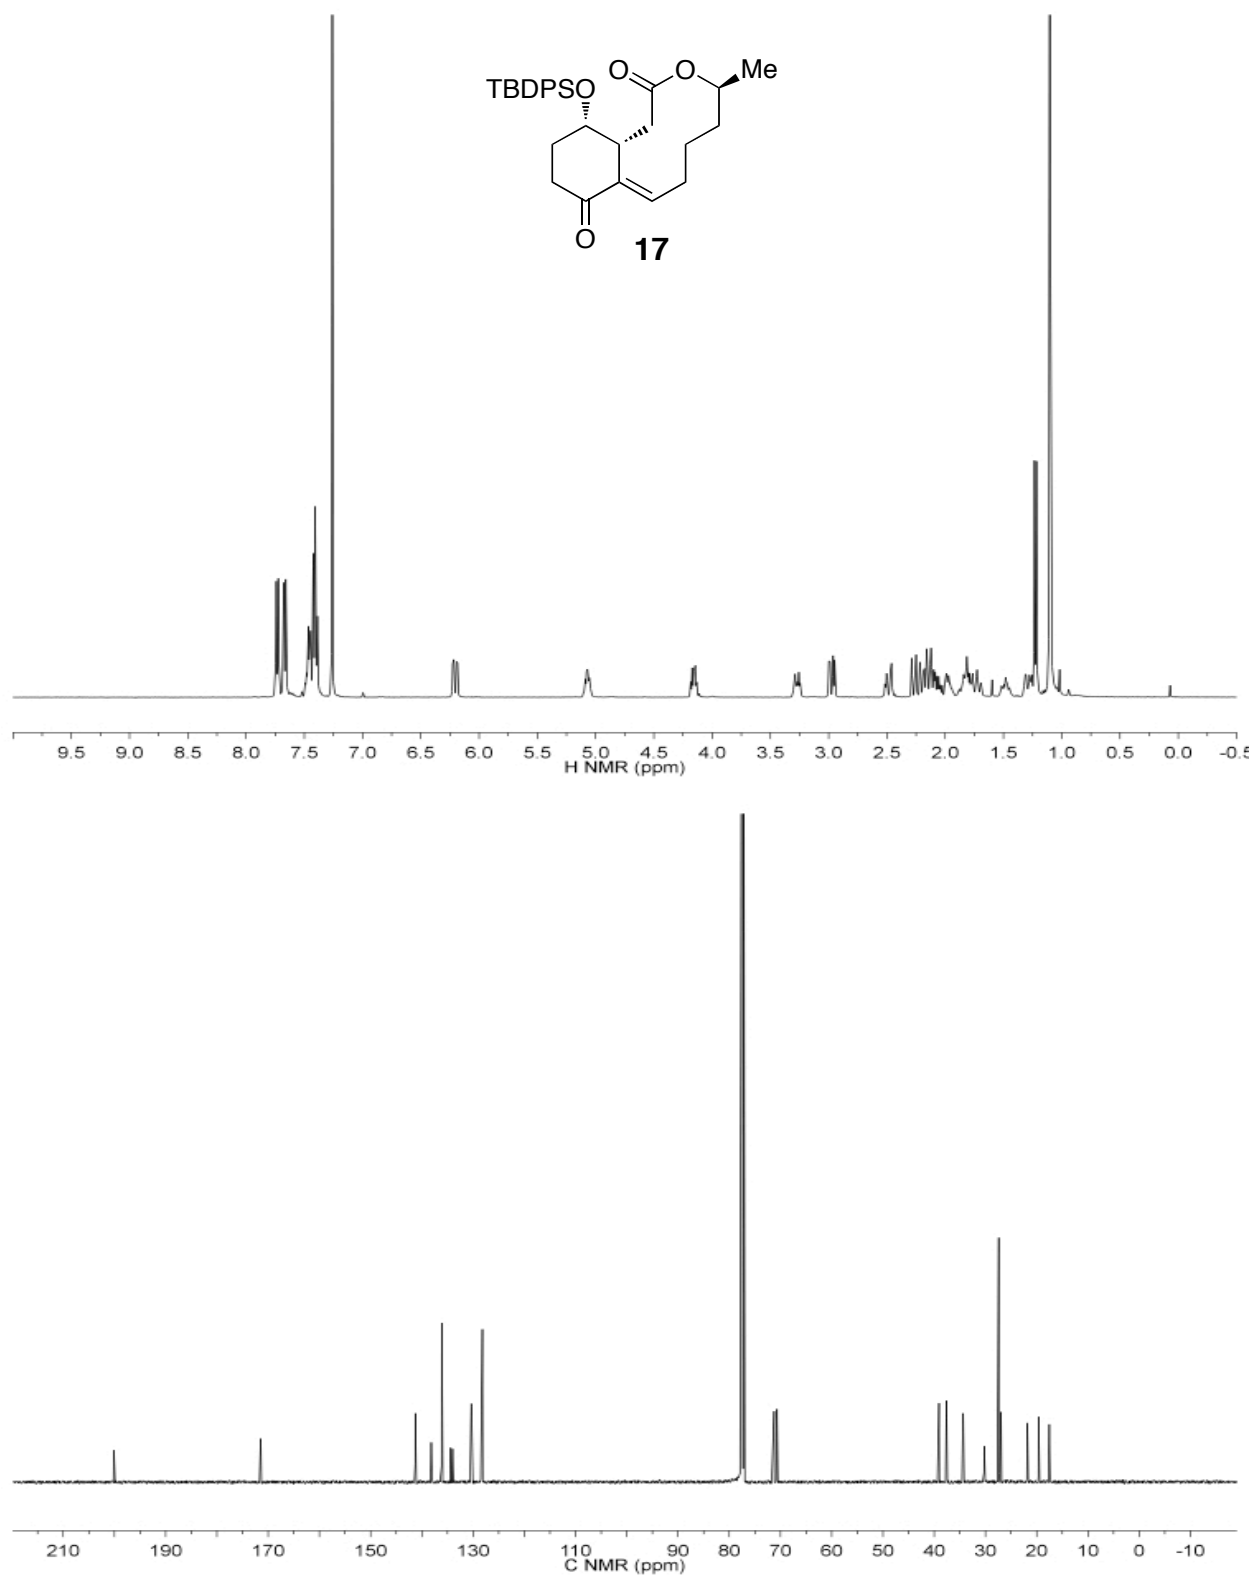

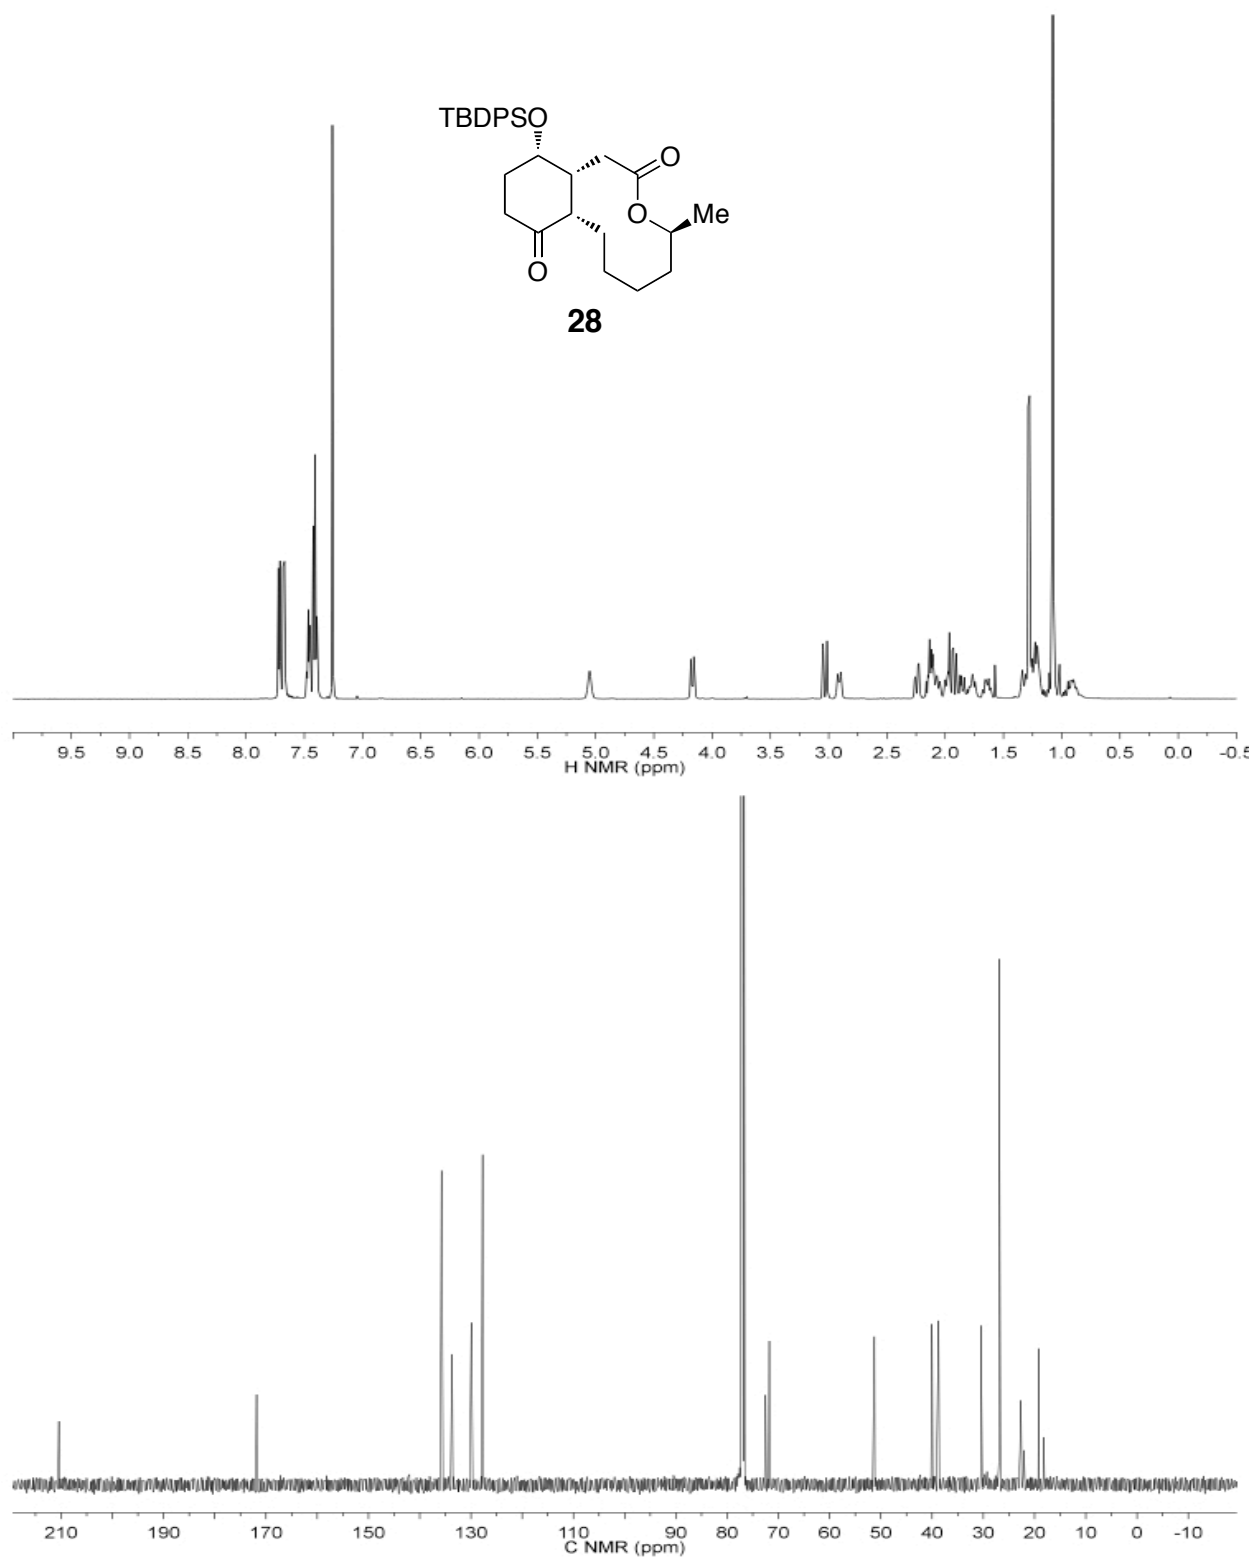

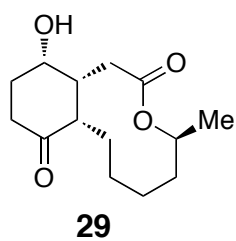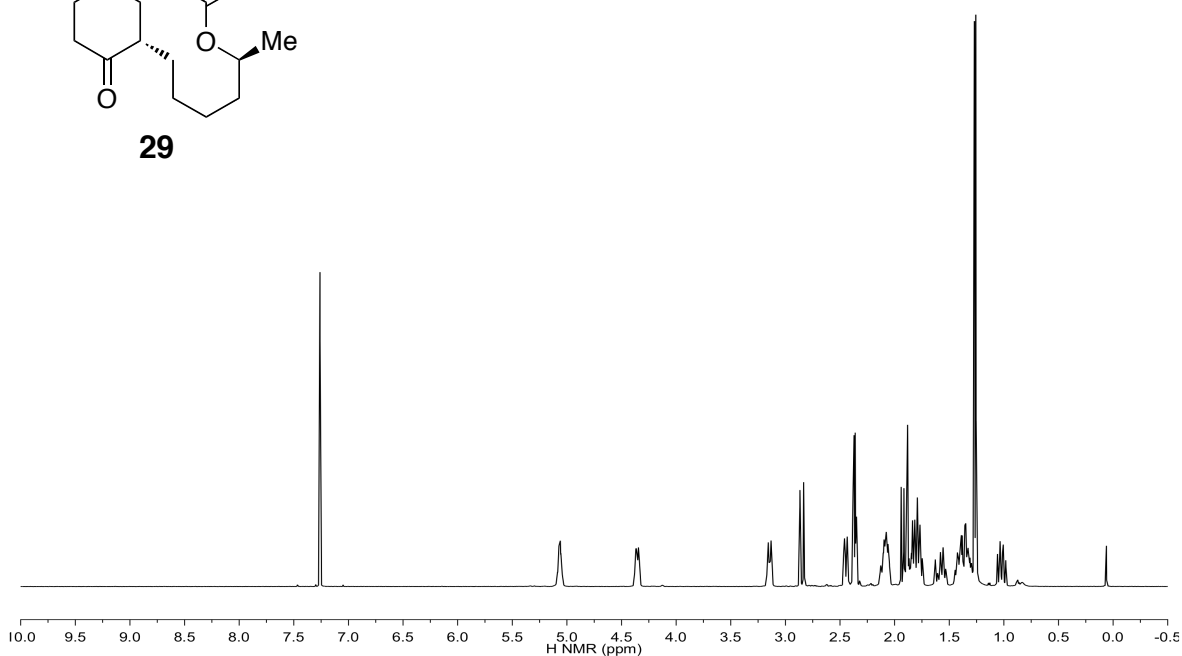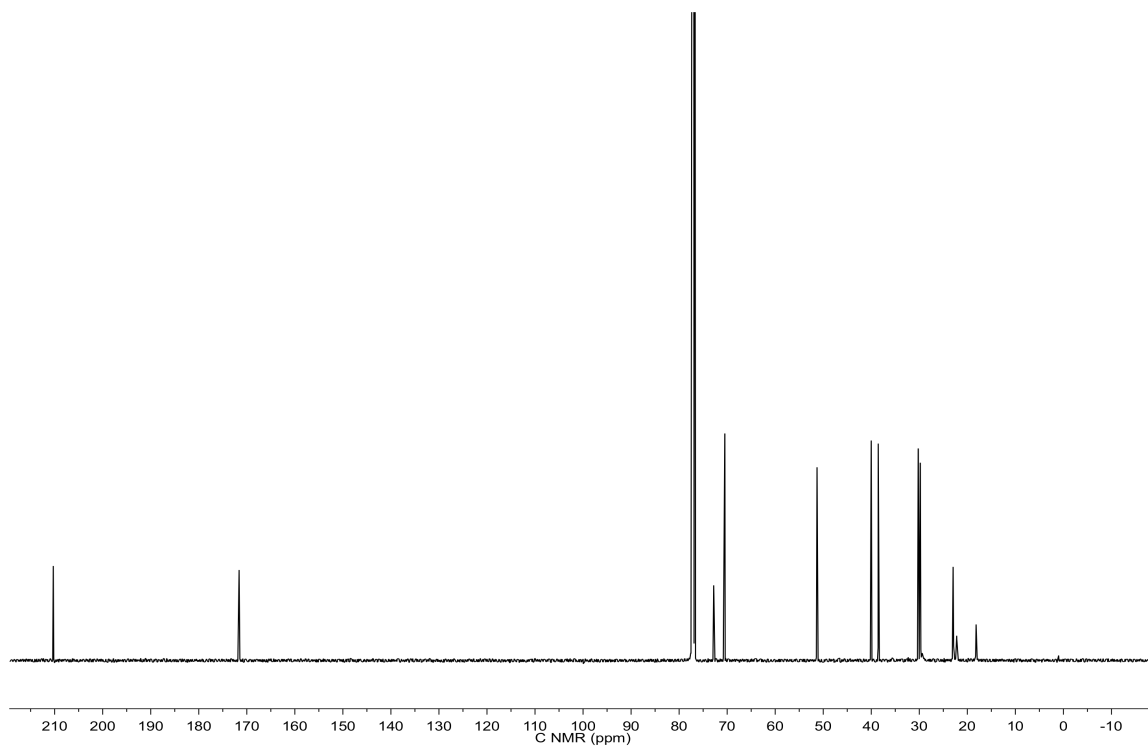

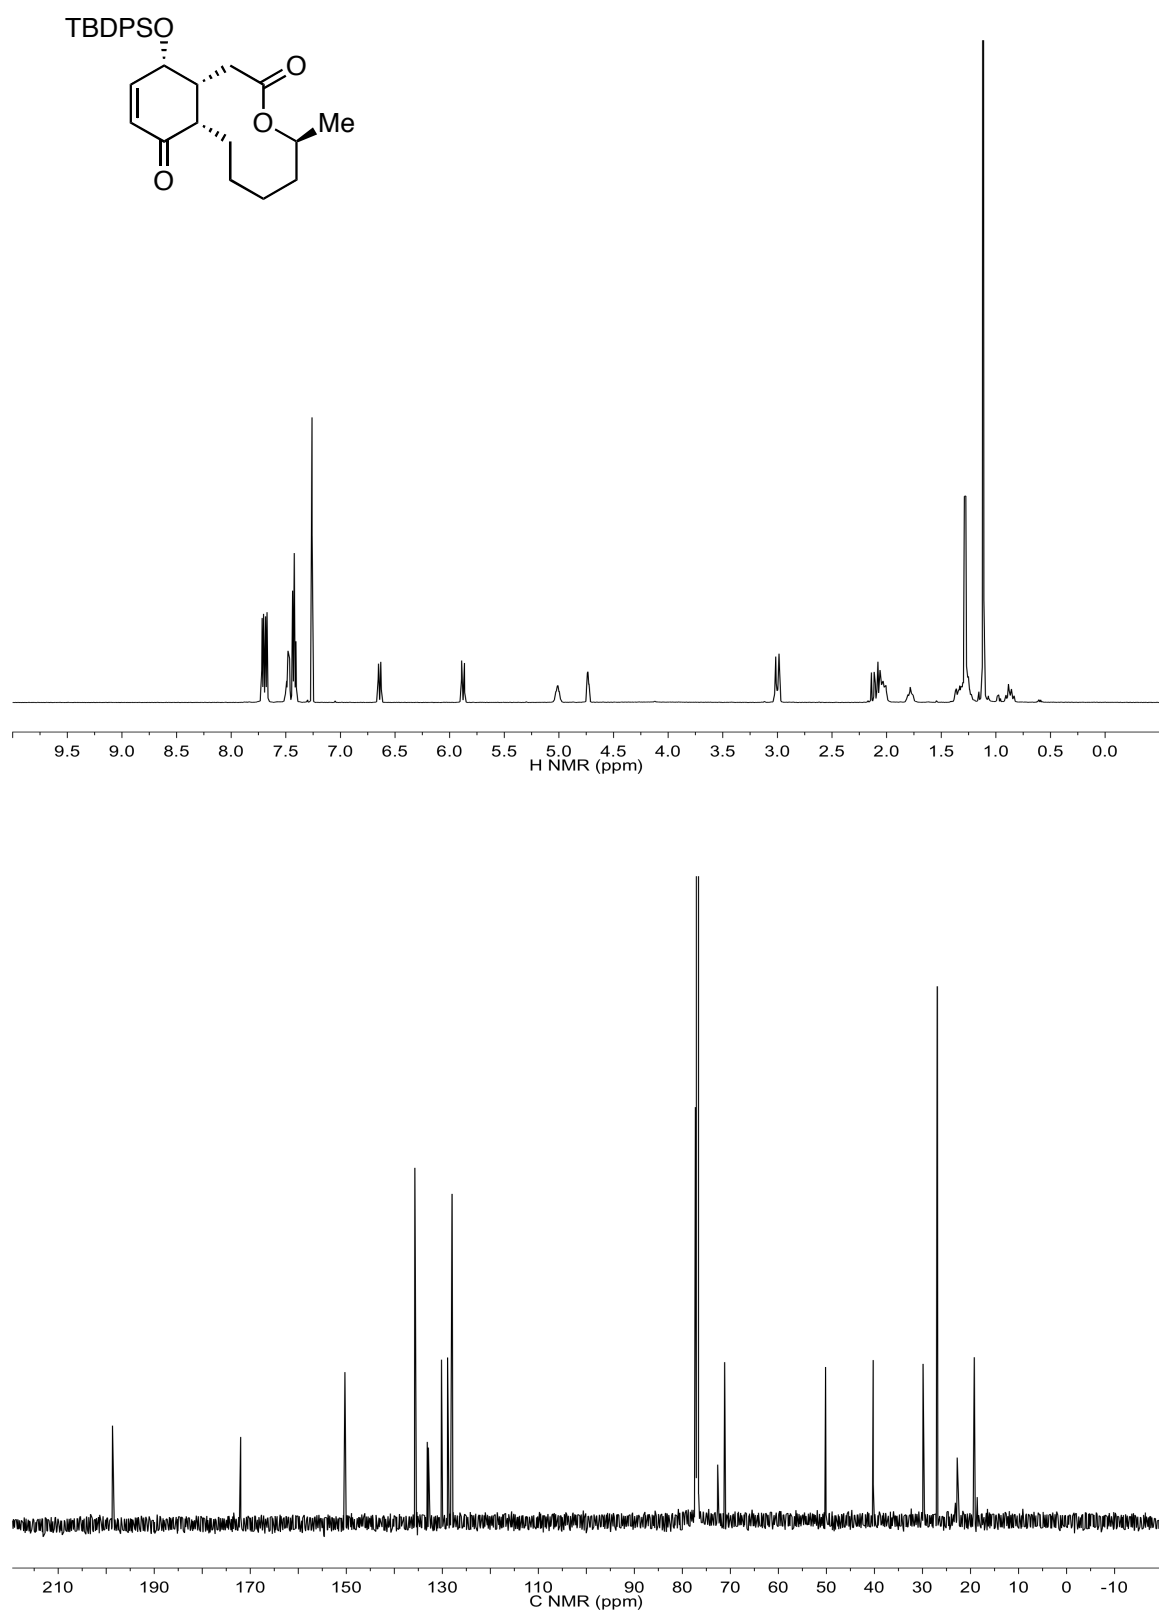

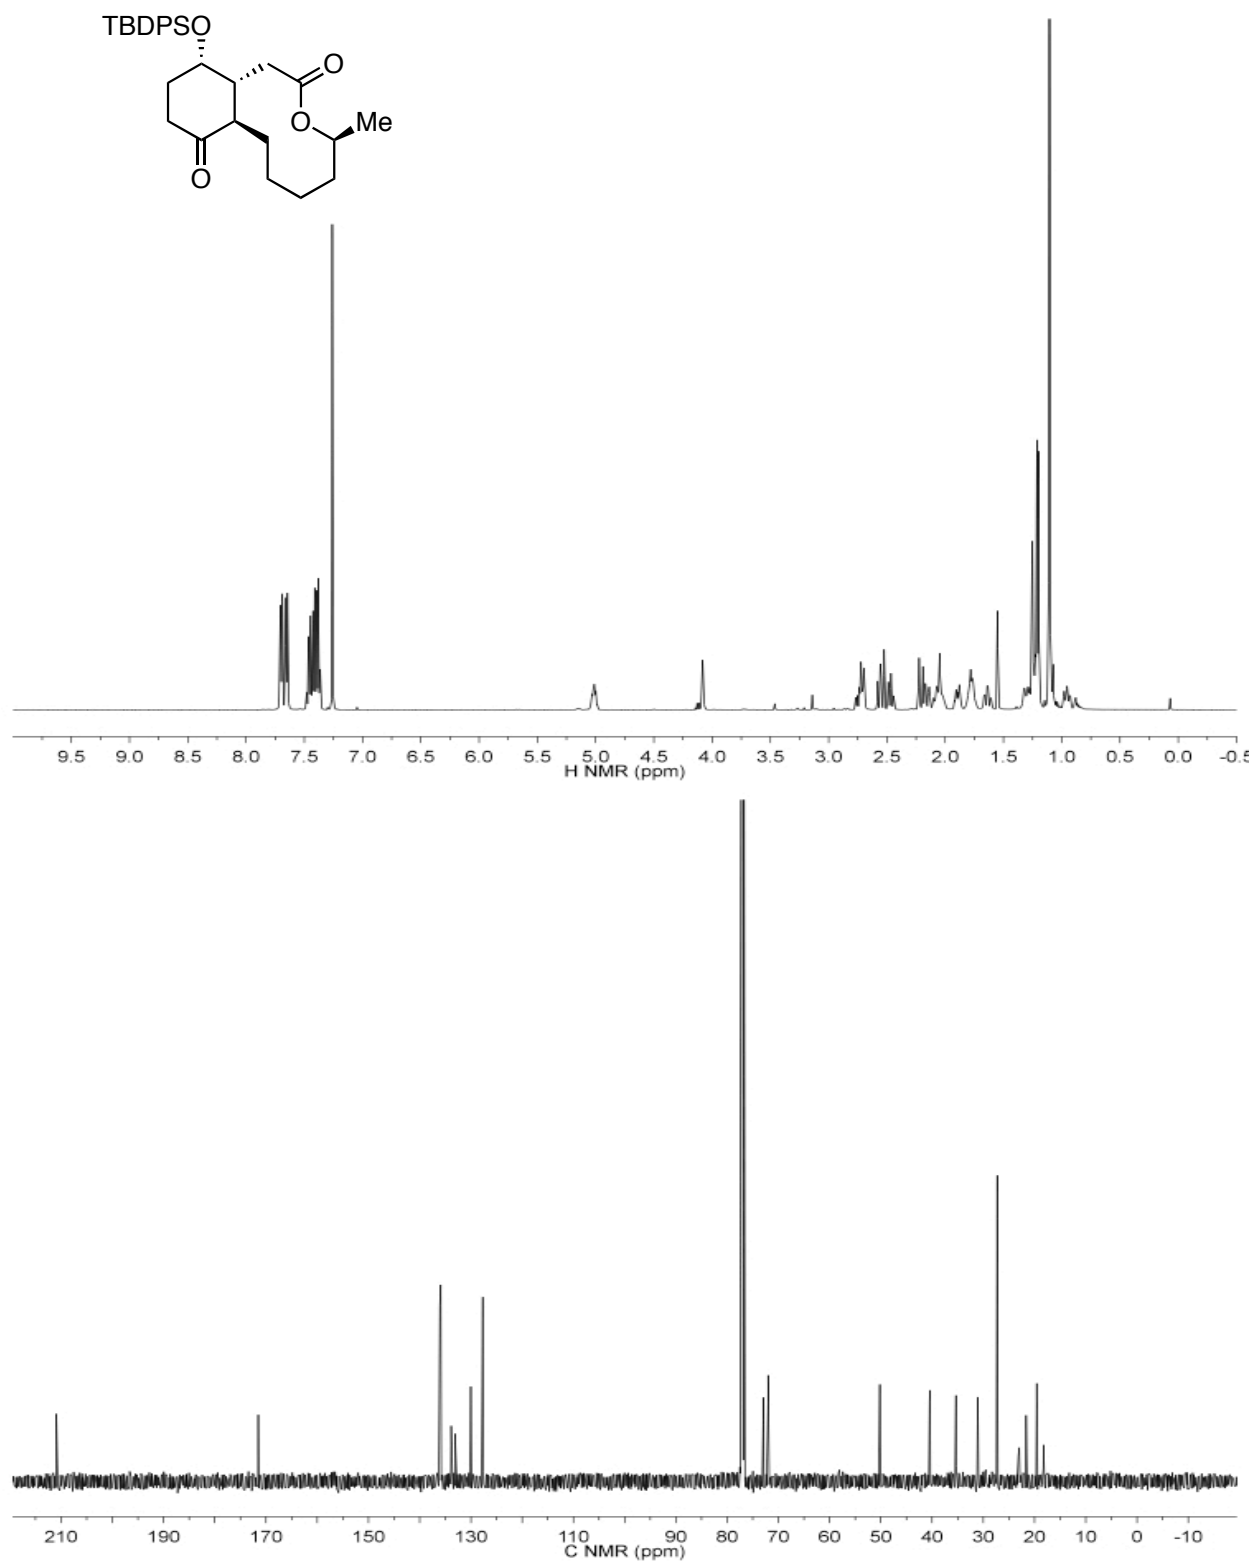

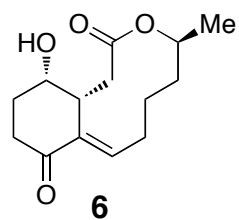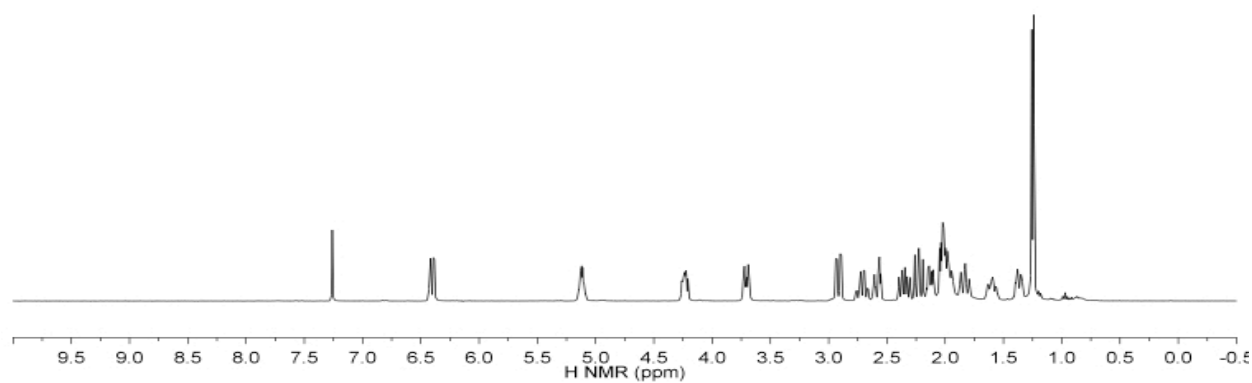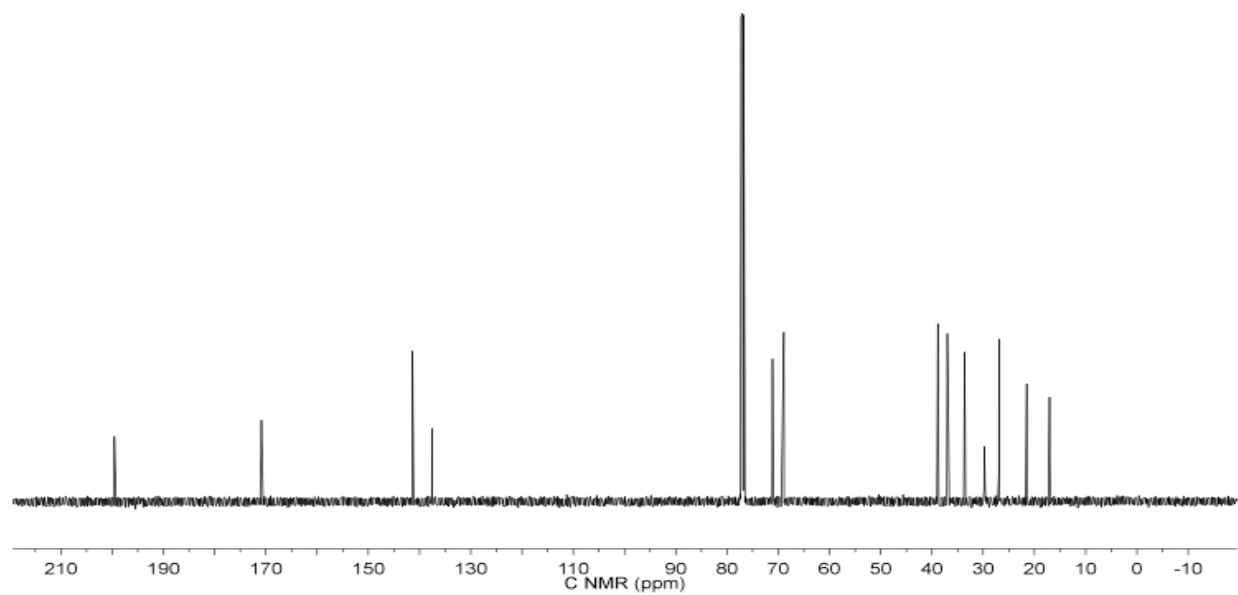



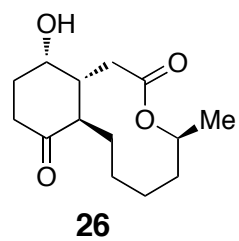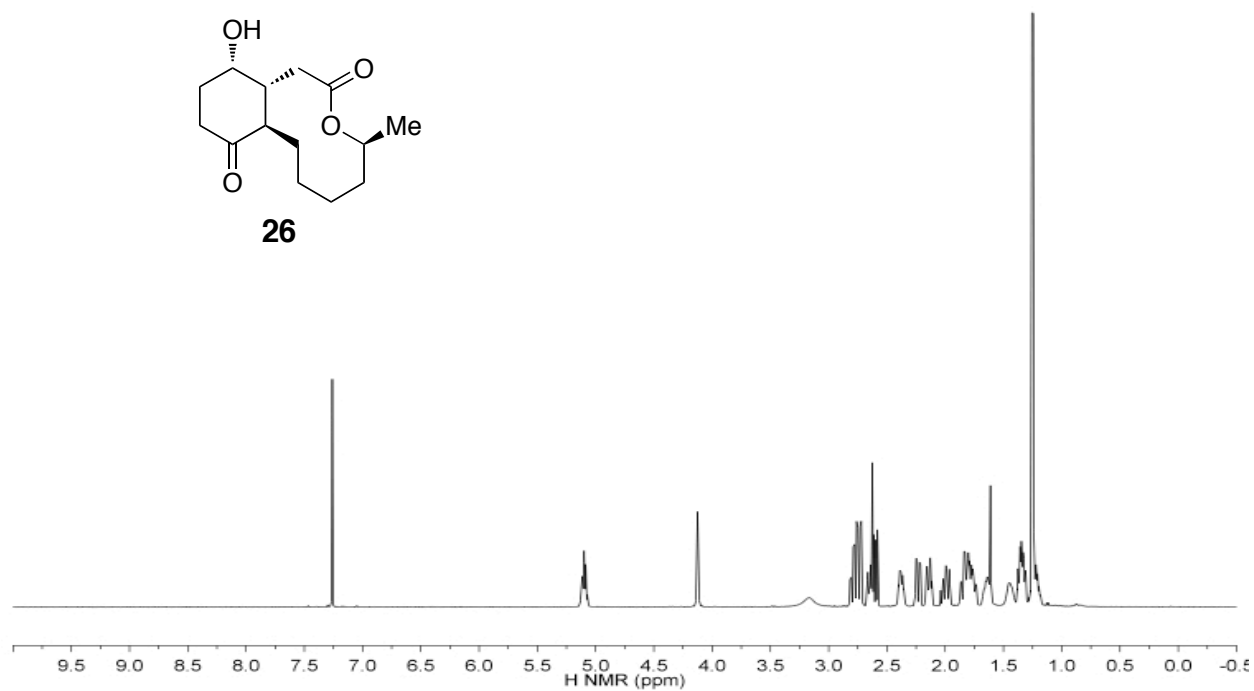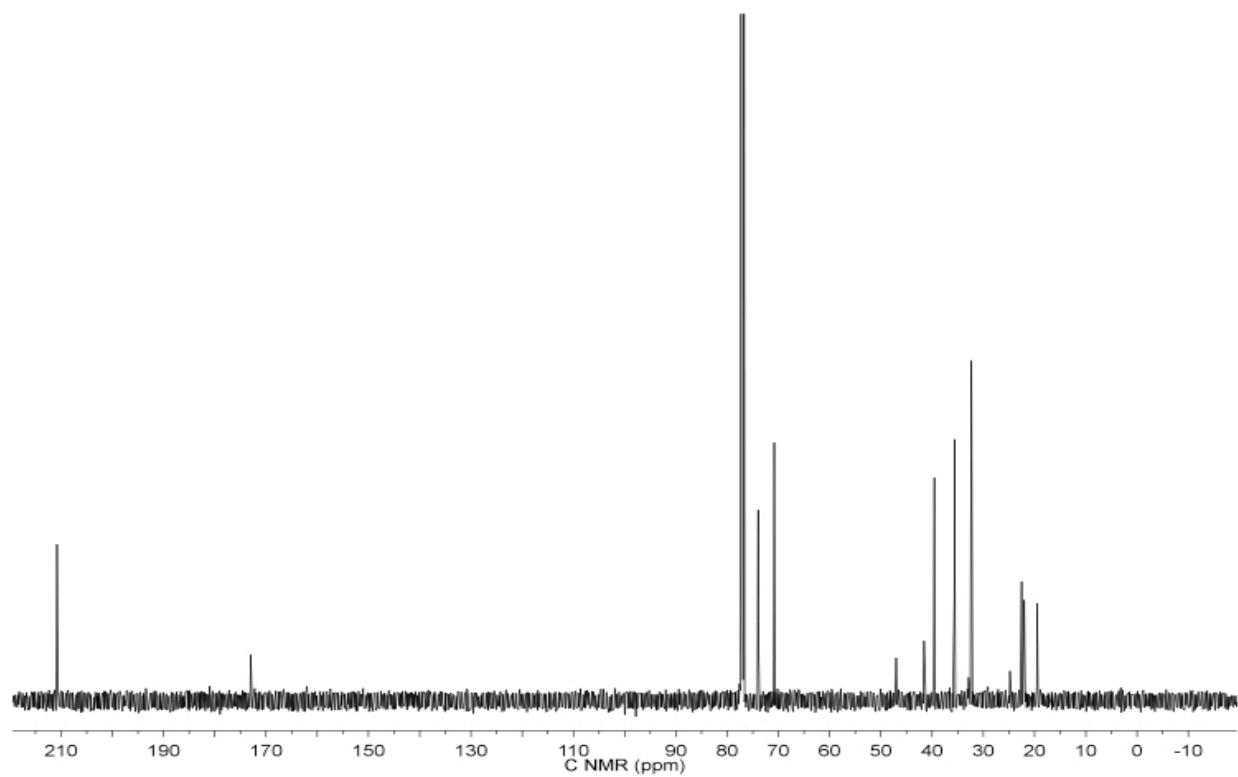

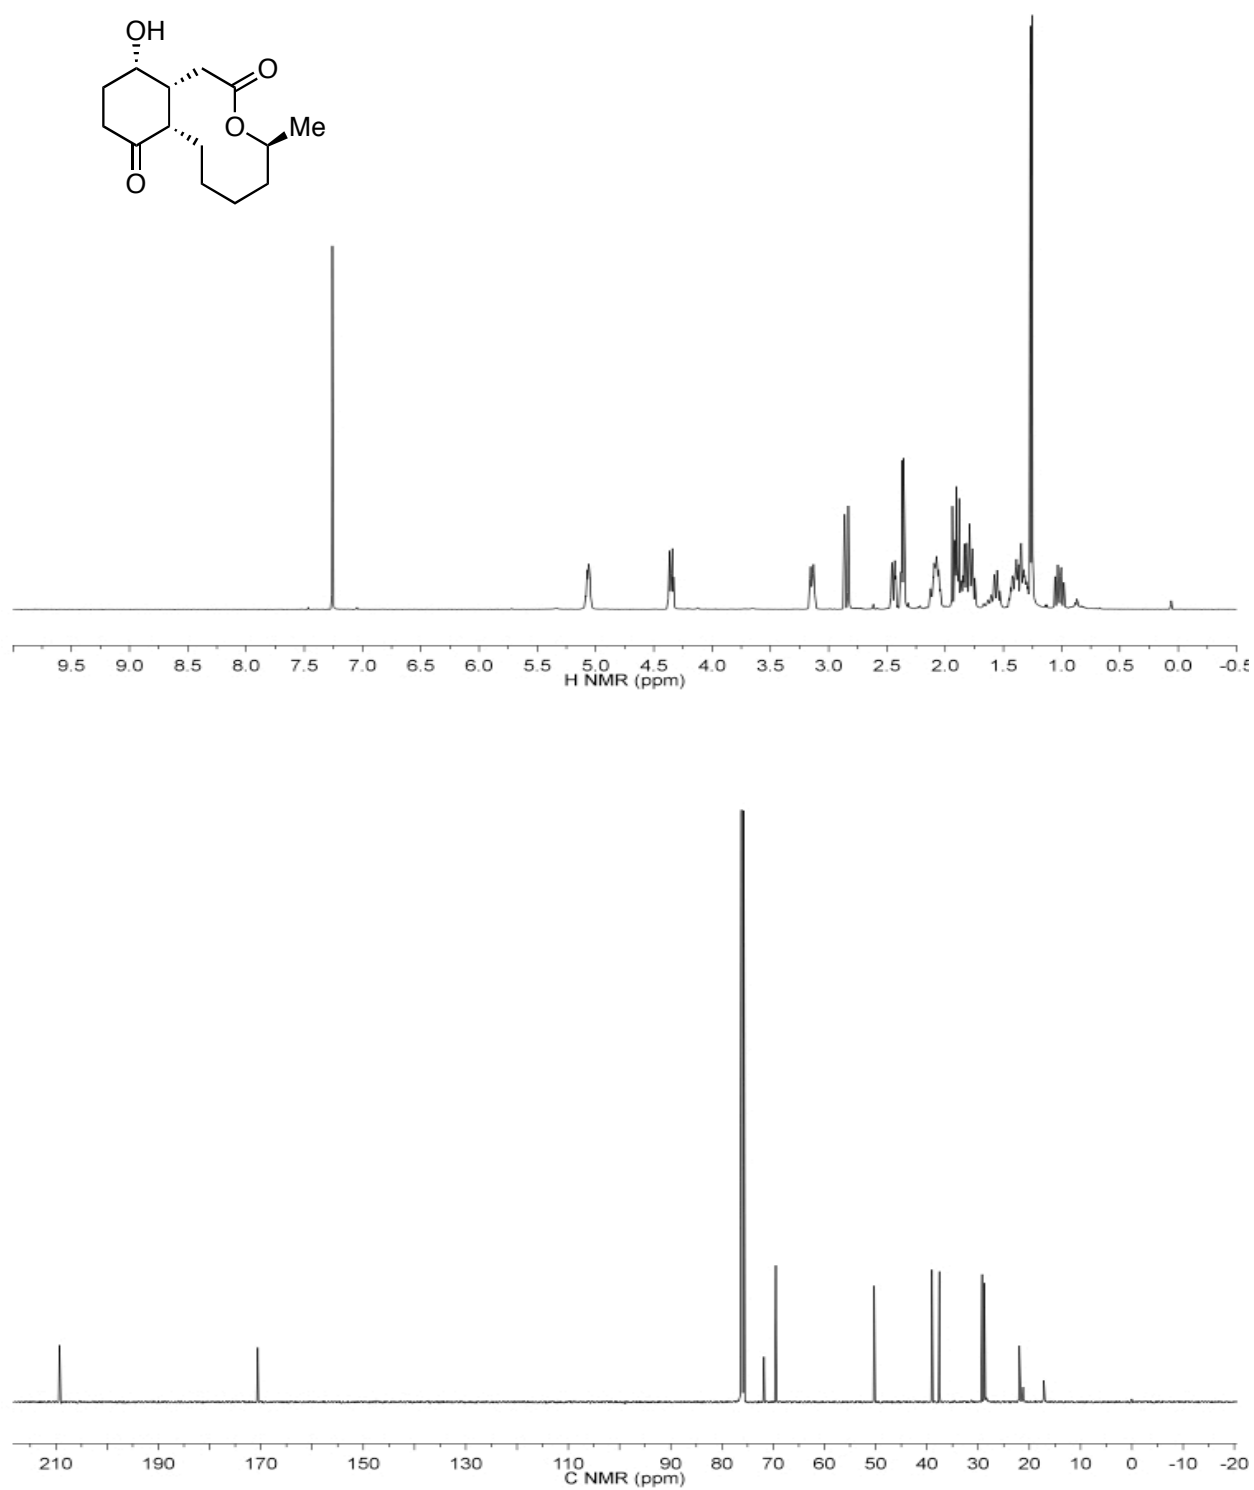

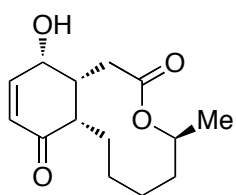

***epi*-Sch-642305**

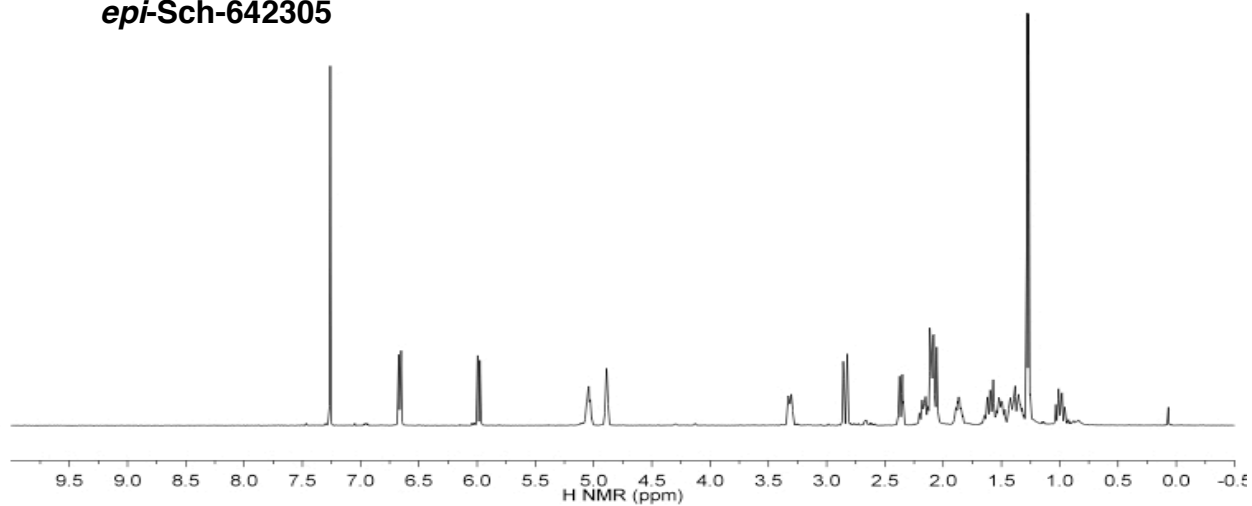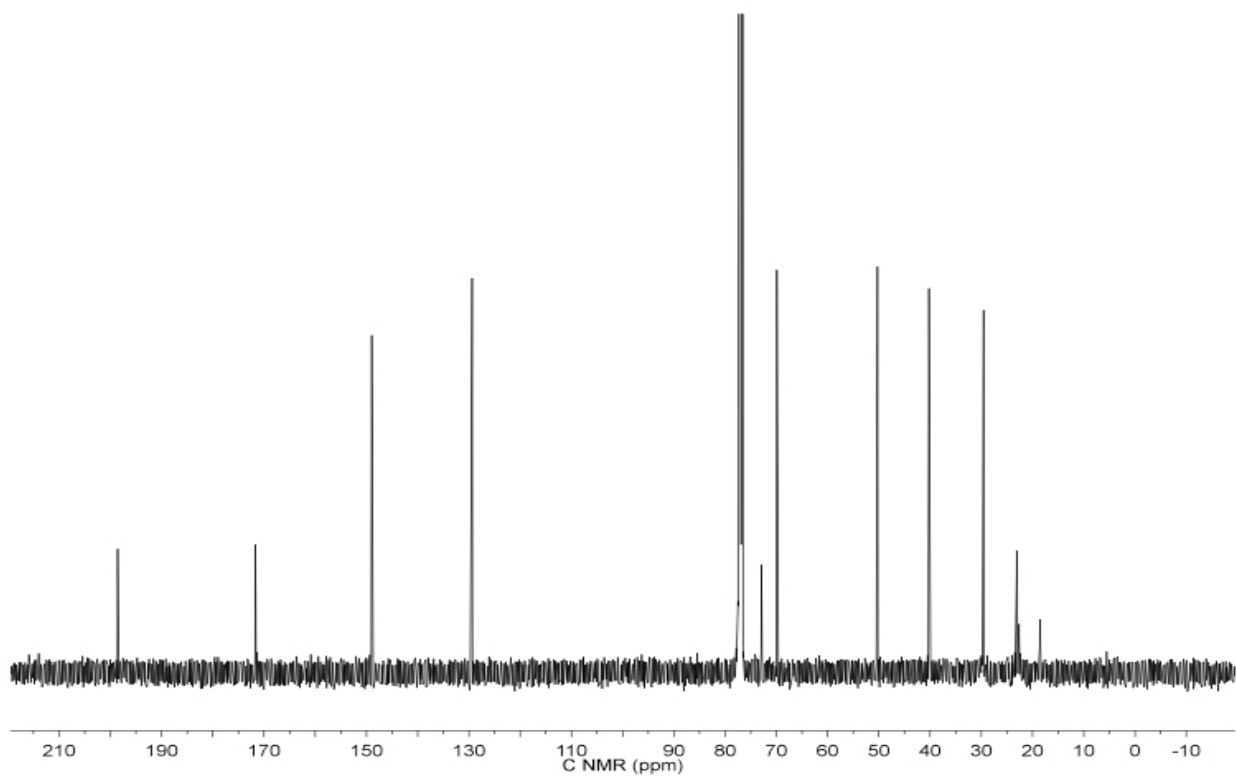

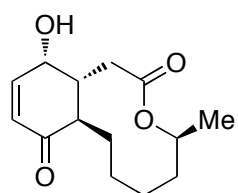

**Sch-642305**

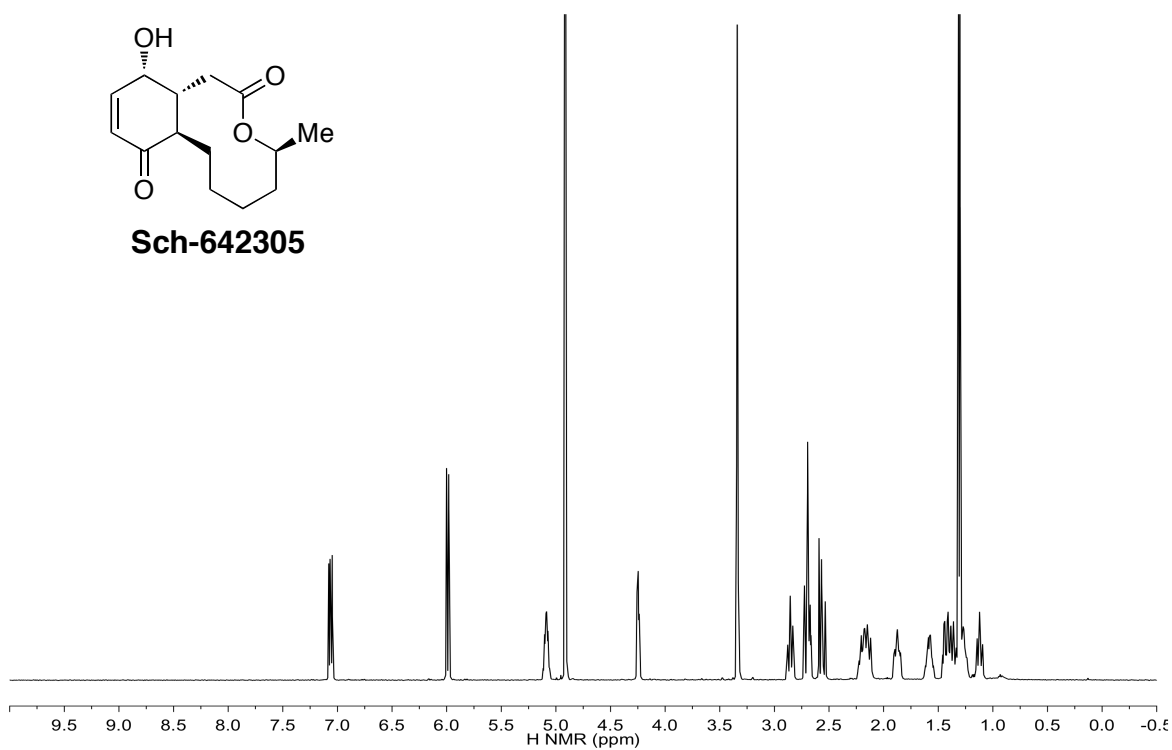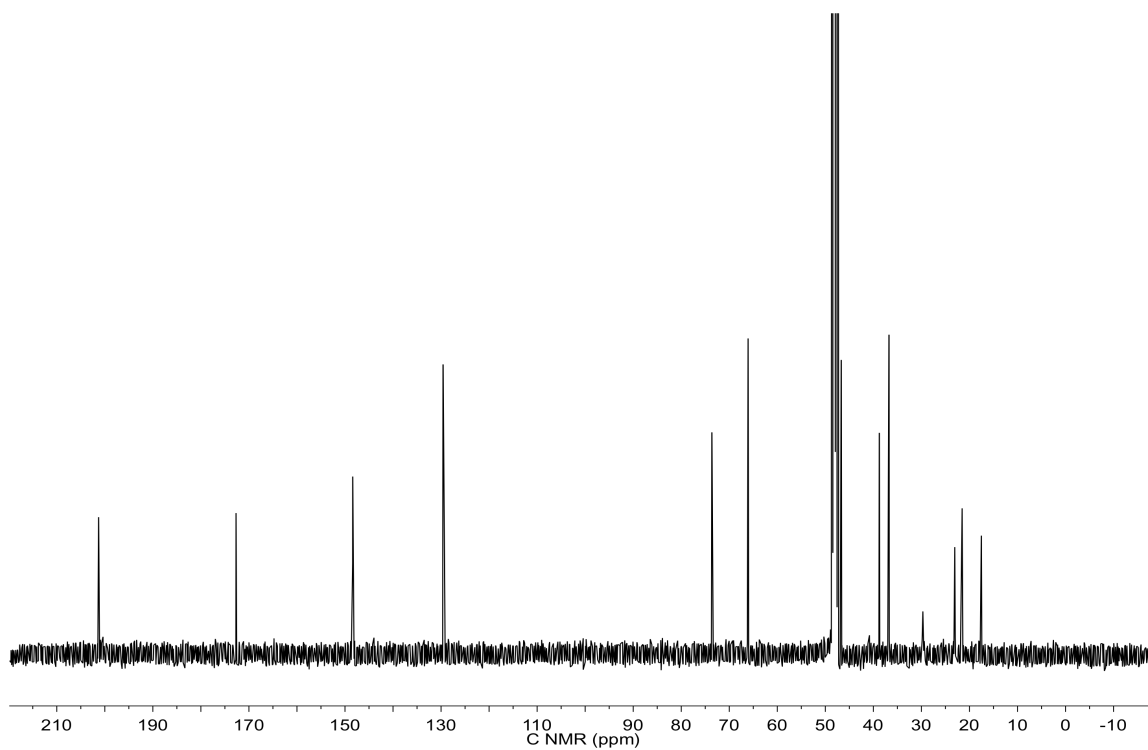

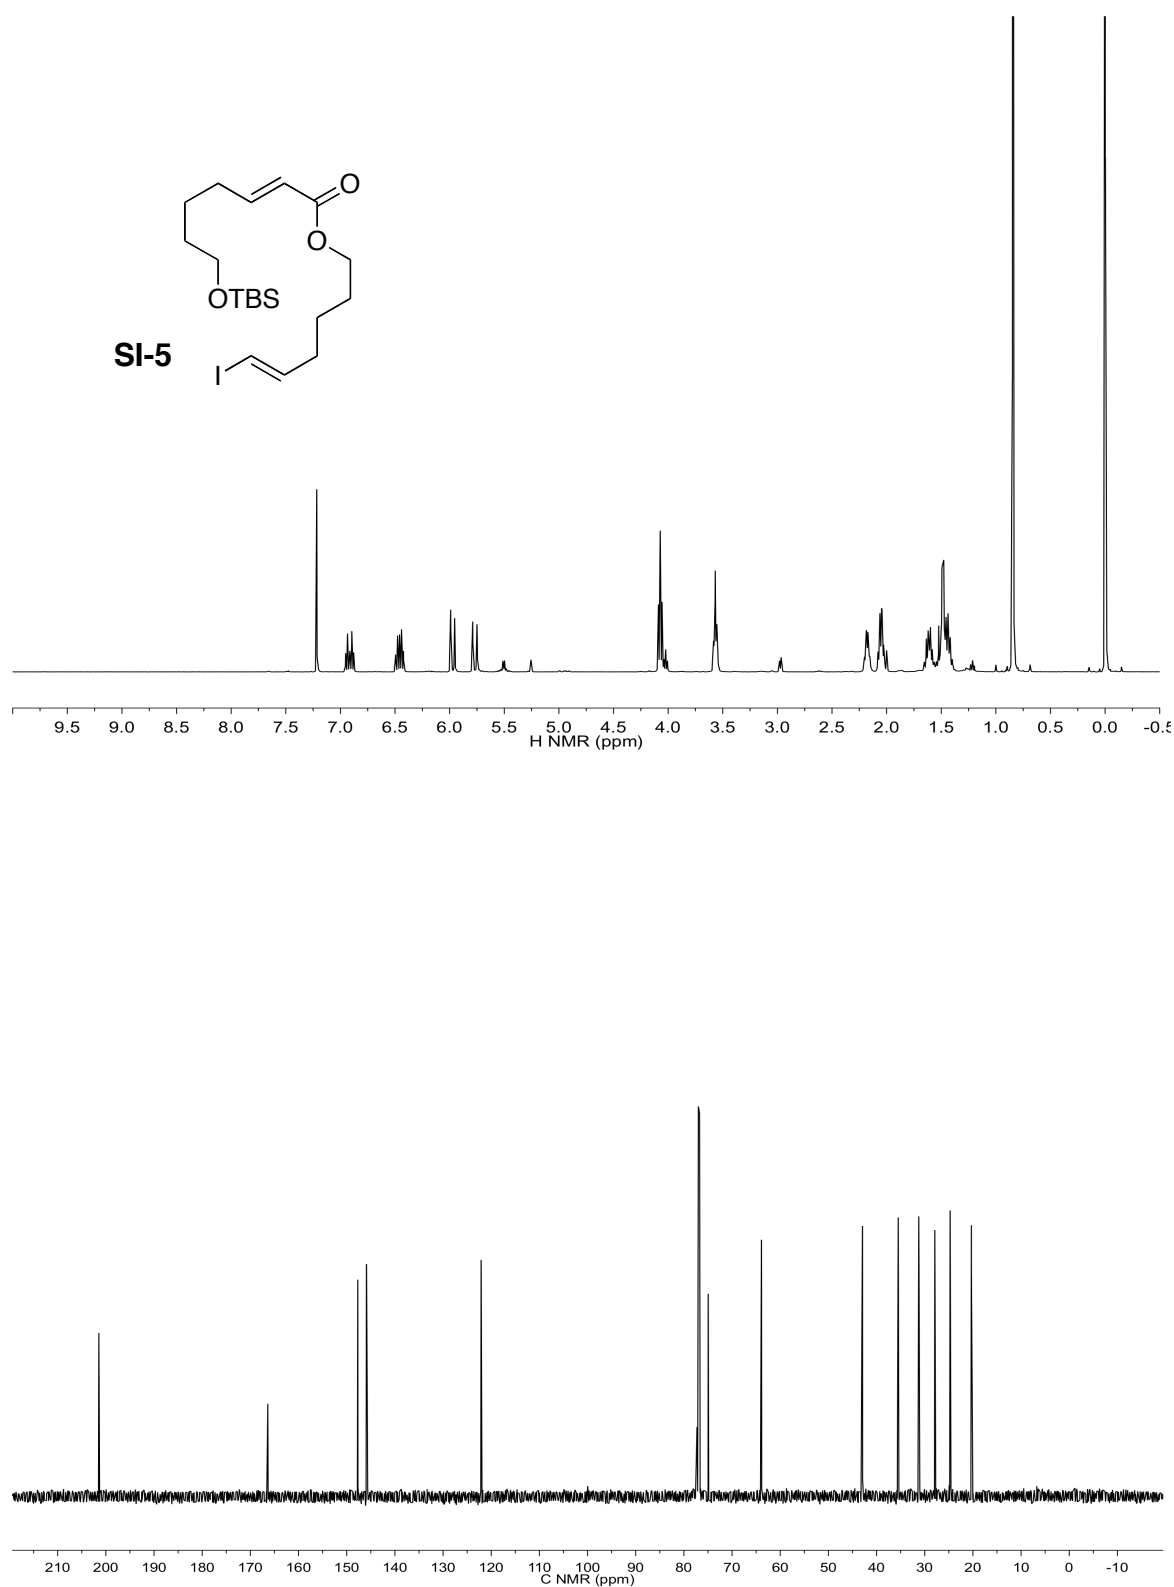

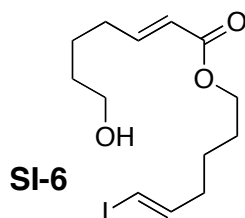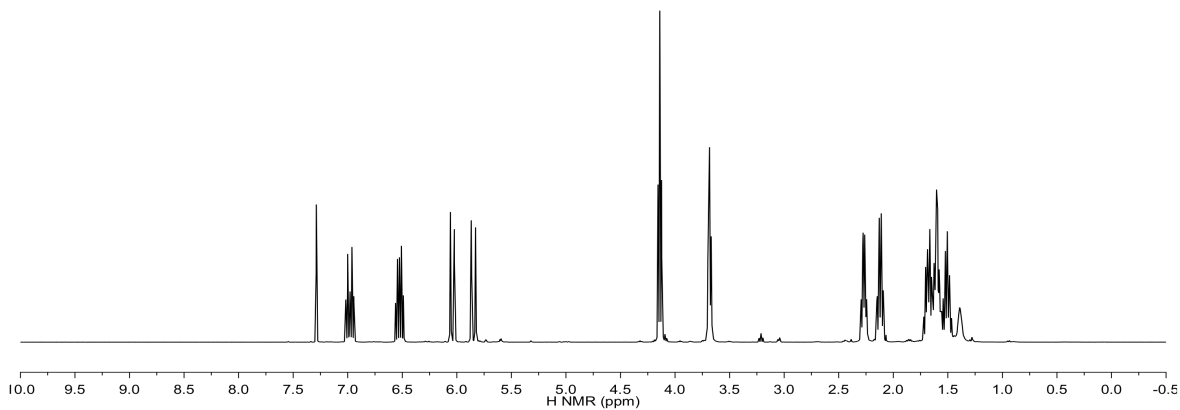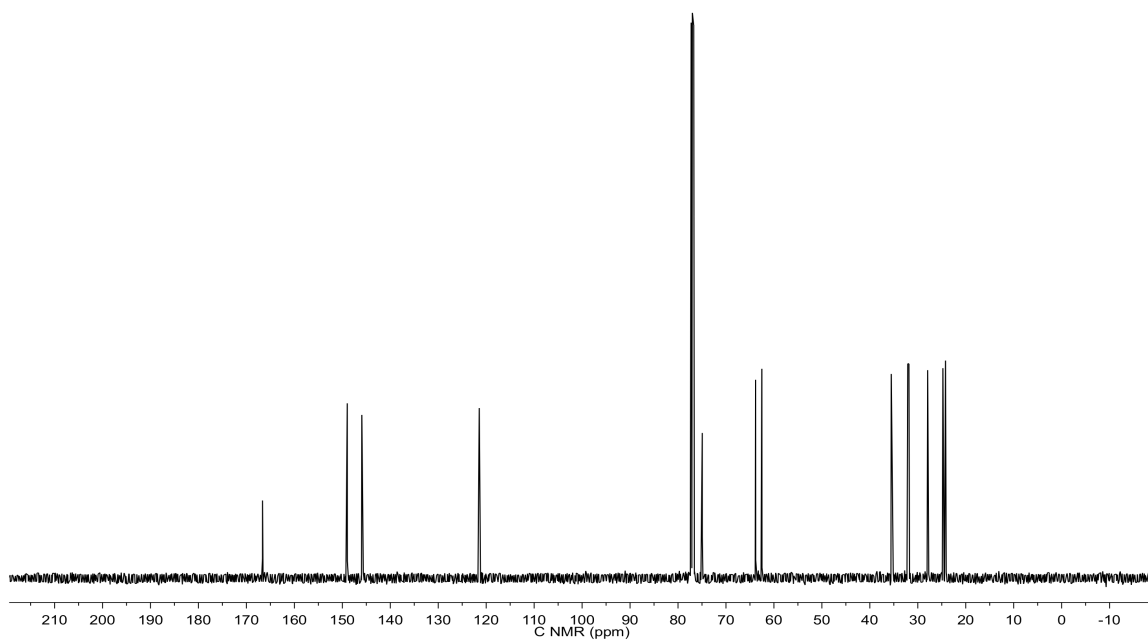

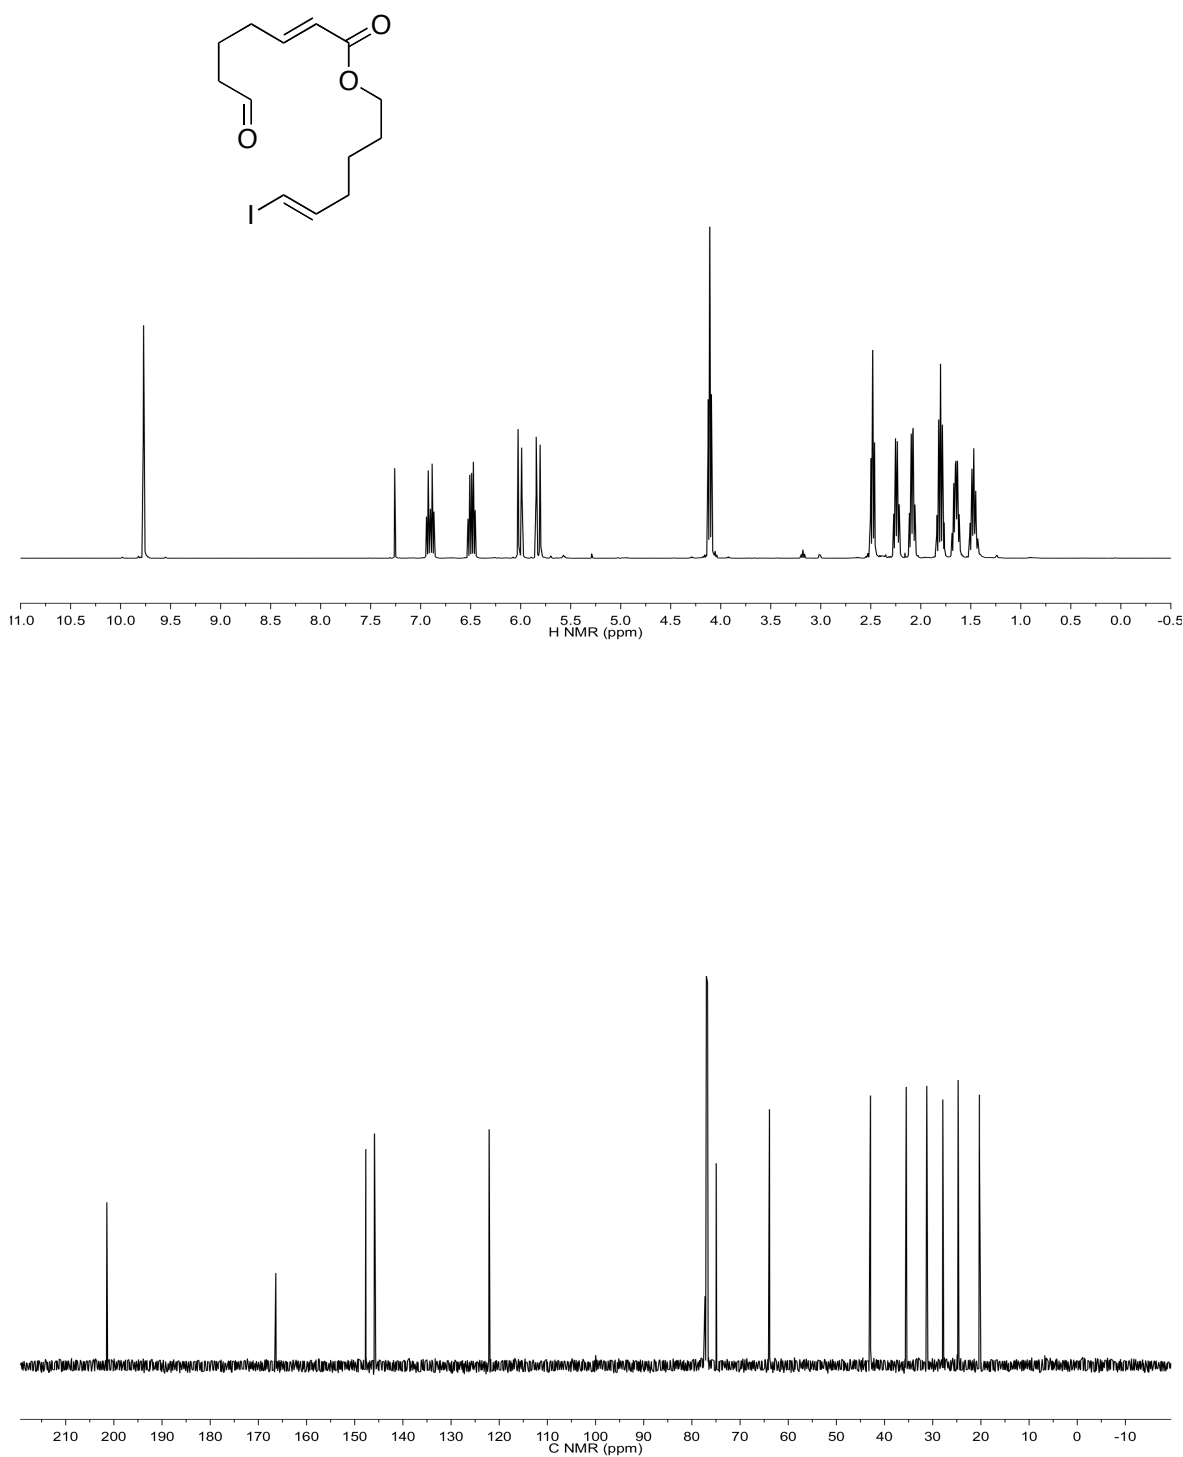

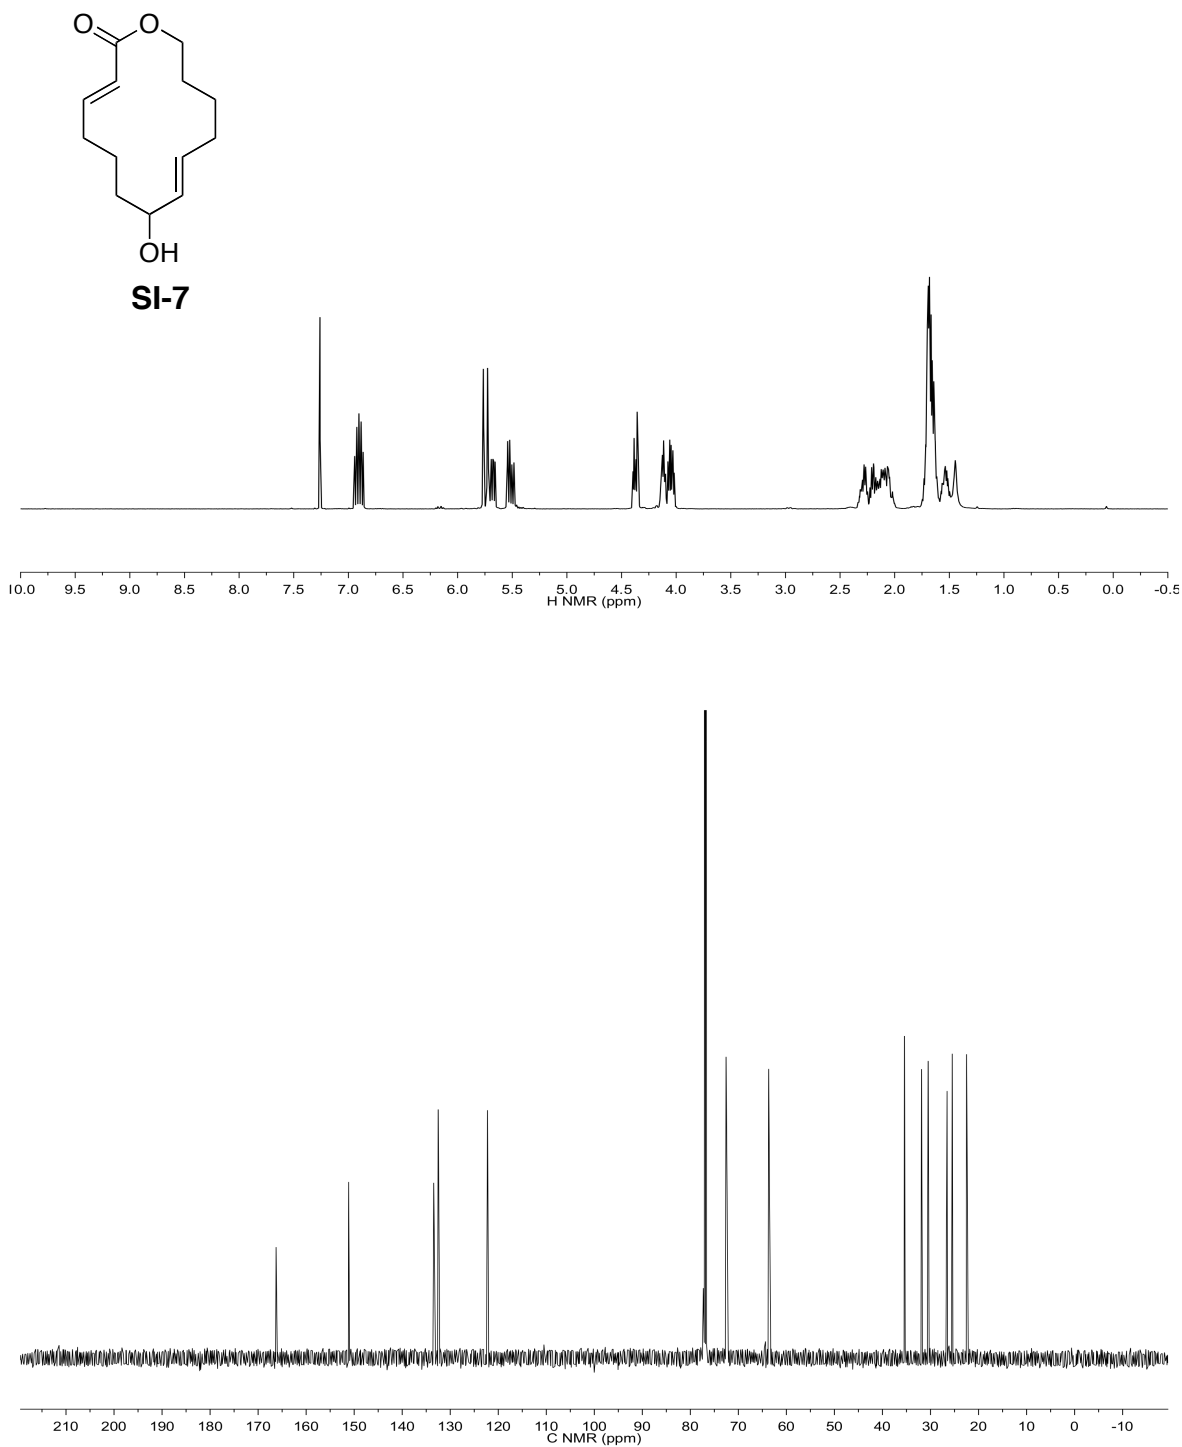



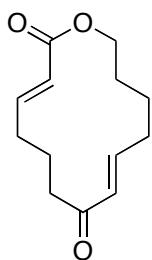

**24**

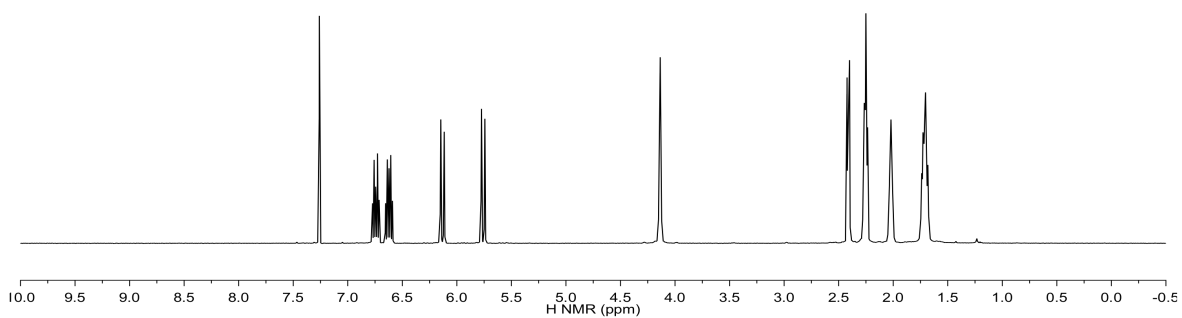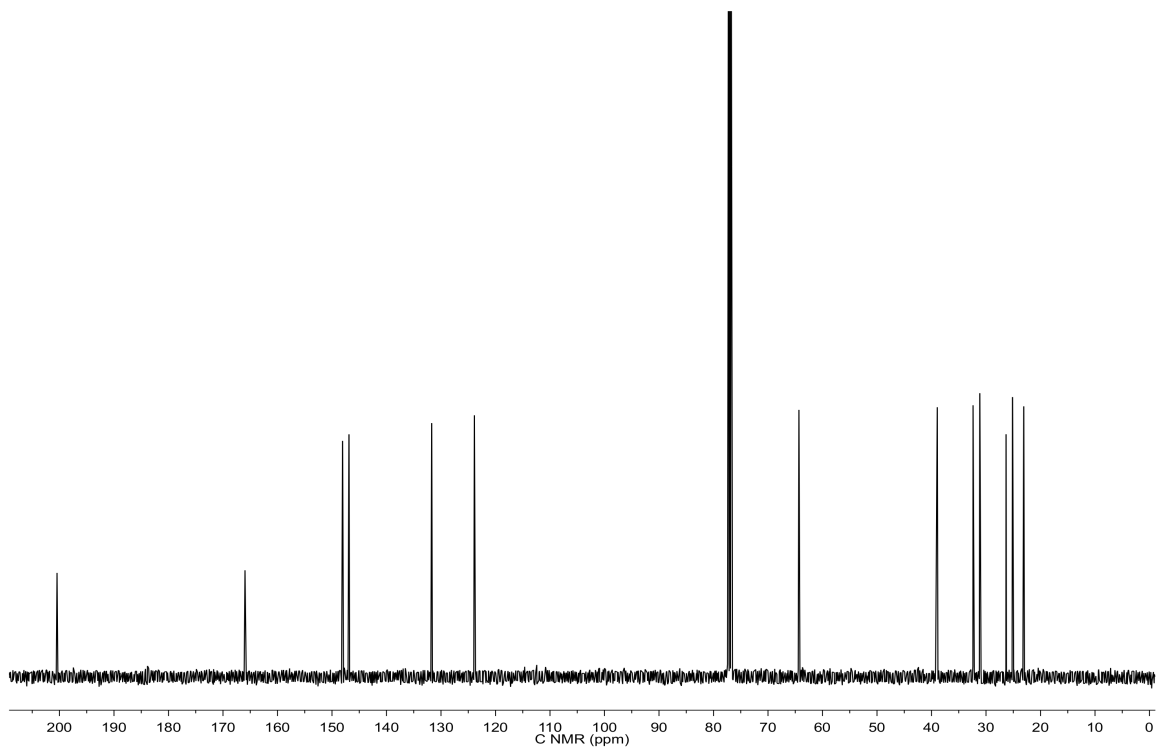

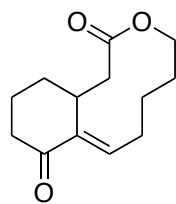

**25**

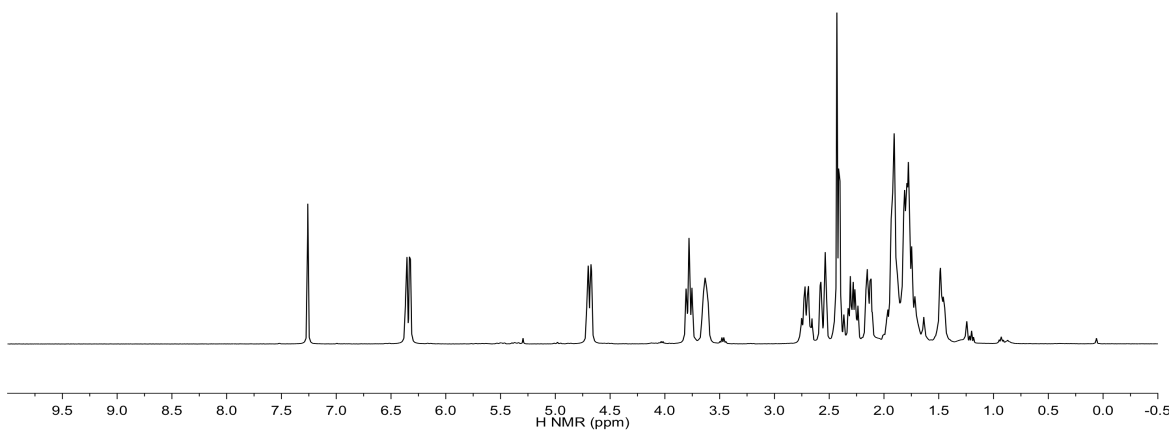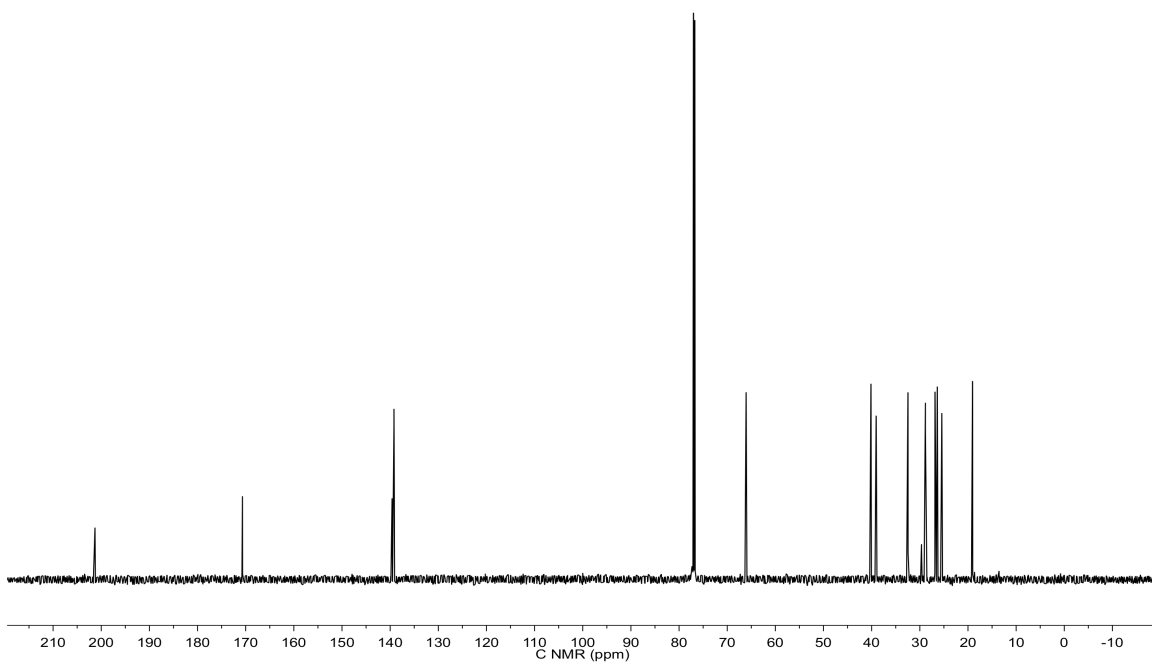

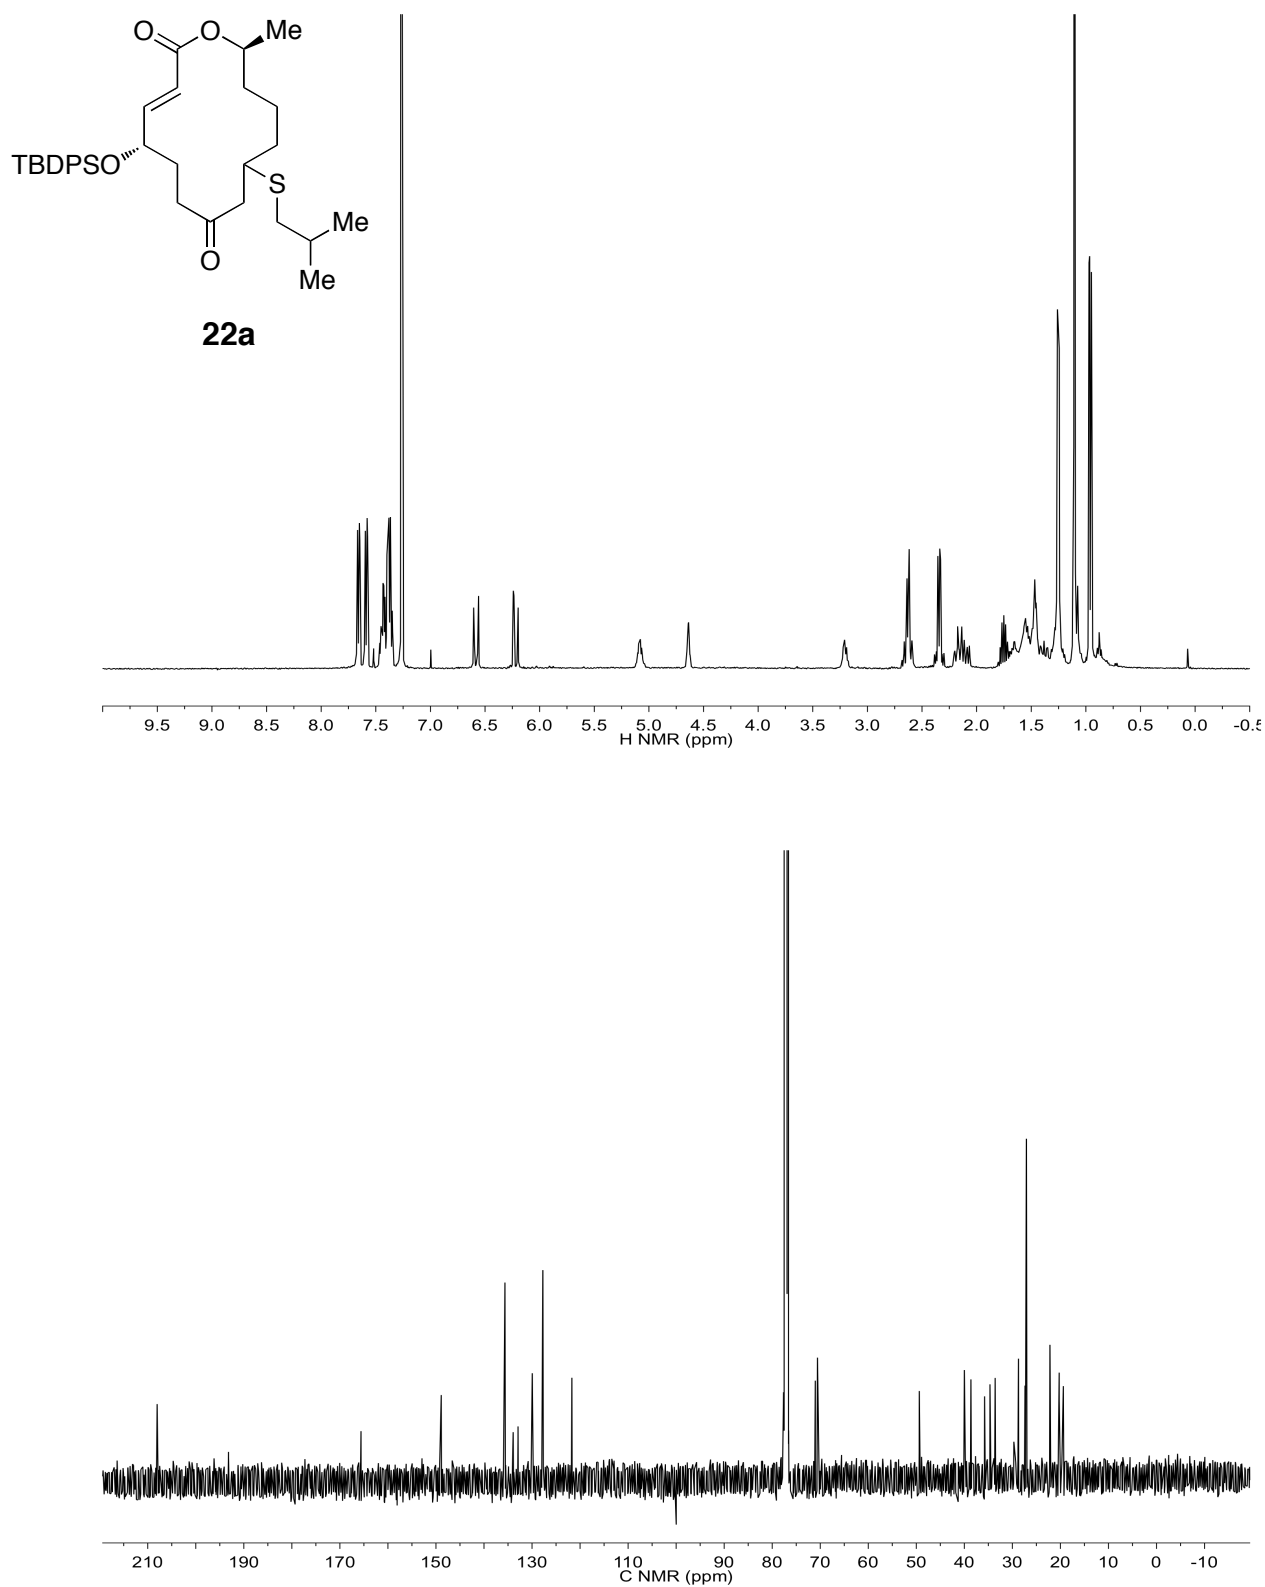

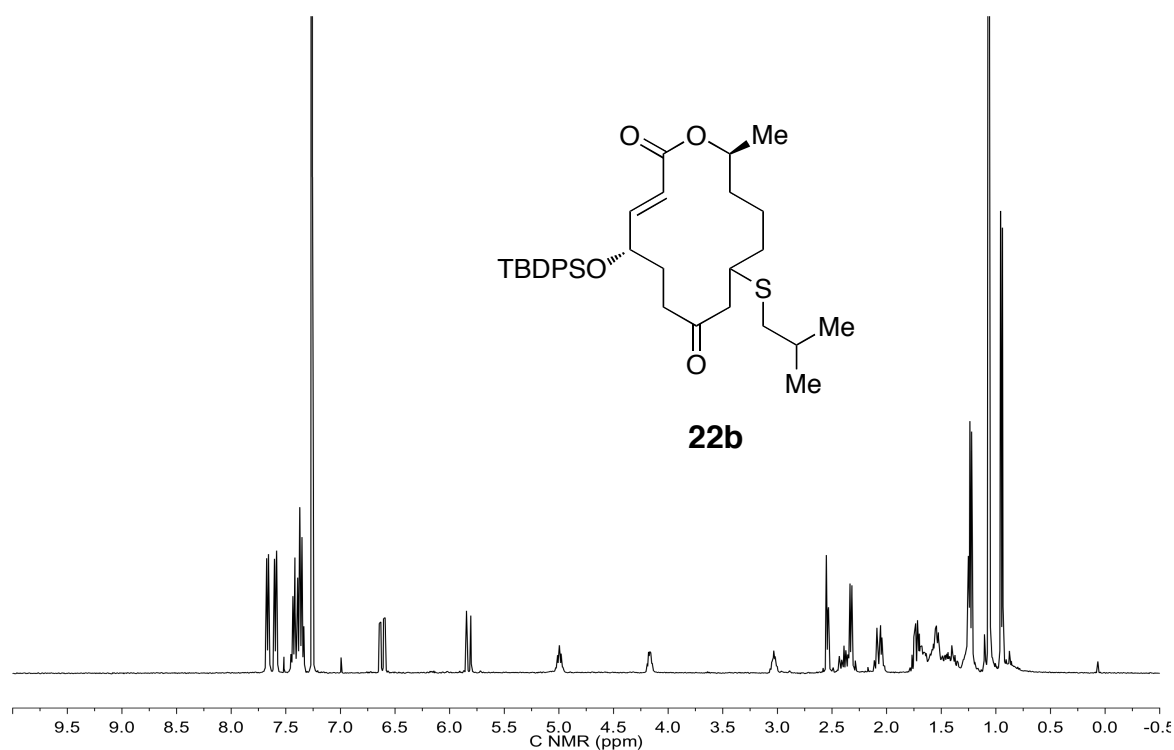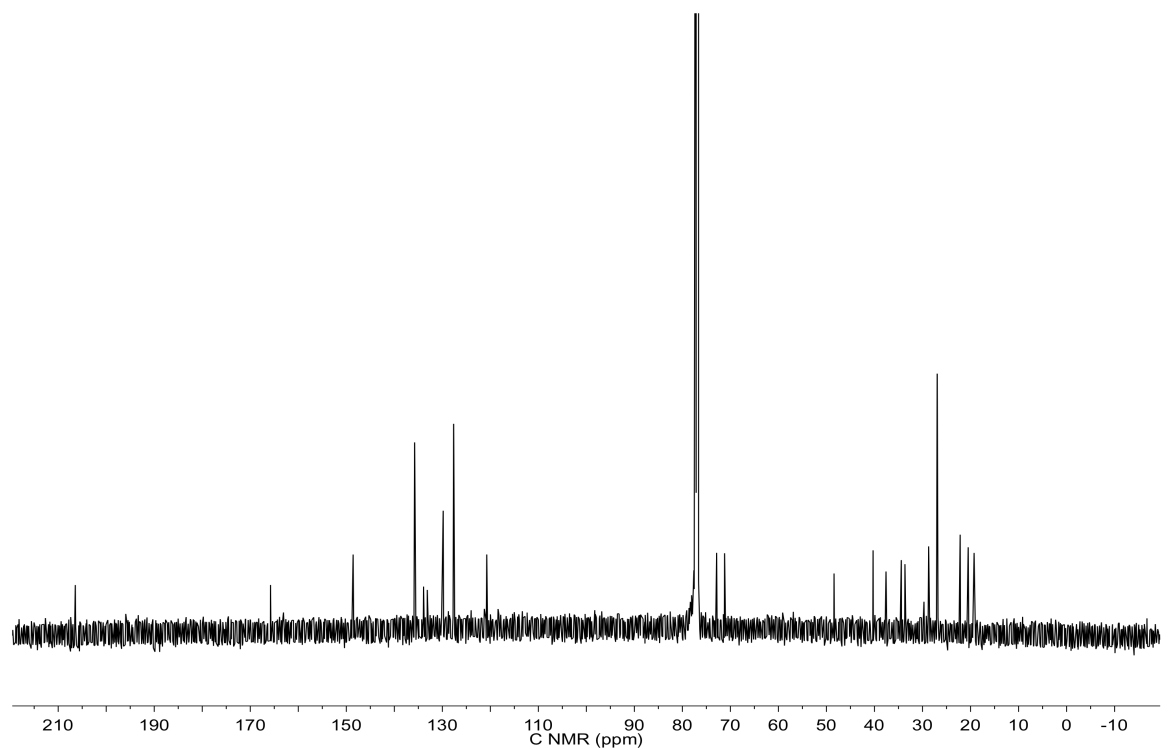

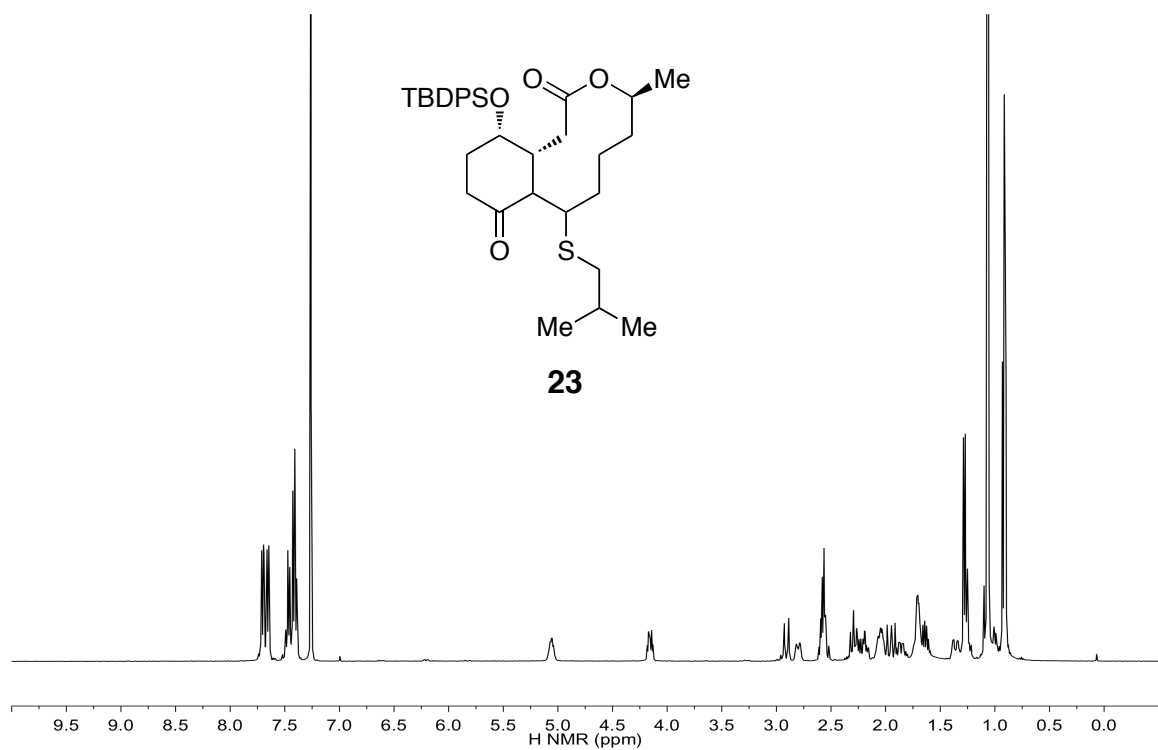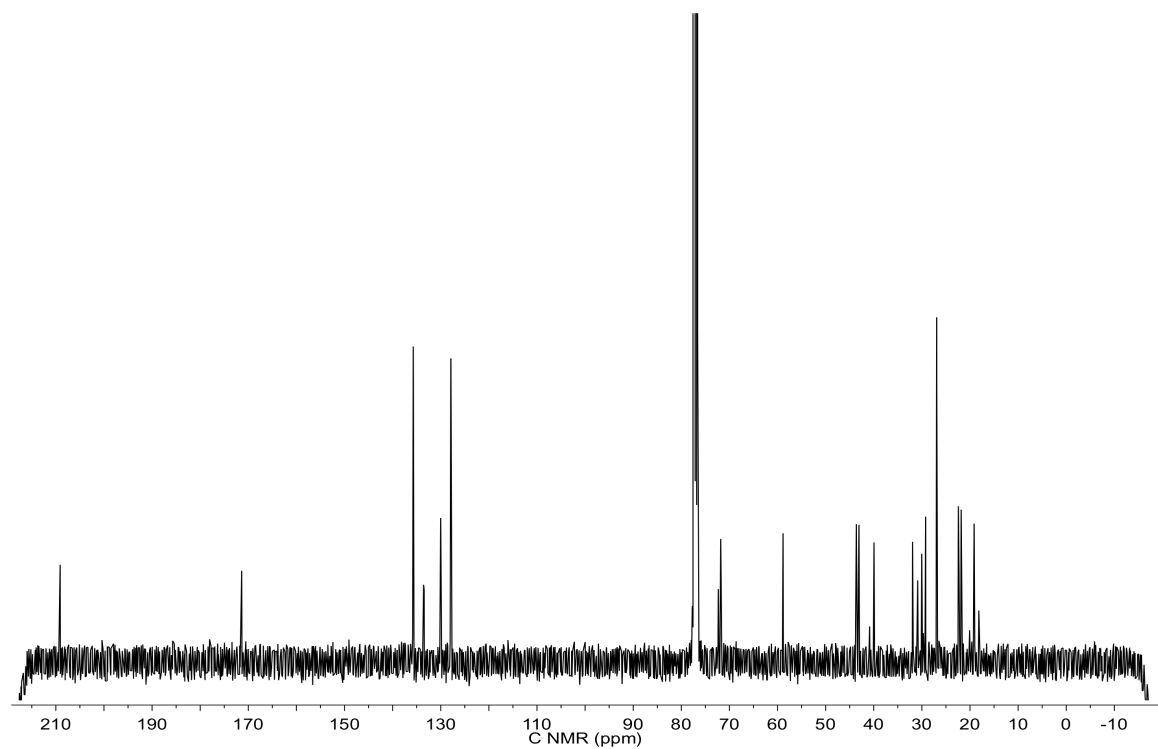

Supplement: c1sc00221j_2.pdf [file c1sc00221j_2.pdf]
